# Supplementary material for: Identification of the initial molecular changes in response to circulating angiogenic cells-mediated therapy in critical limb ischemia
Source: PubMed Central journal article supplement (PMC7060566; doi:10.1186/s13287-020-01591-0), 2020-03-06
Supplement: 13287_2020_1591_MOESM1_ESM.pdf [file 13287_2020_1591_MOESM1_ESM.pdf]

## Supplementary figure S1

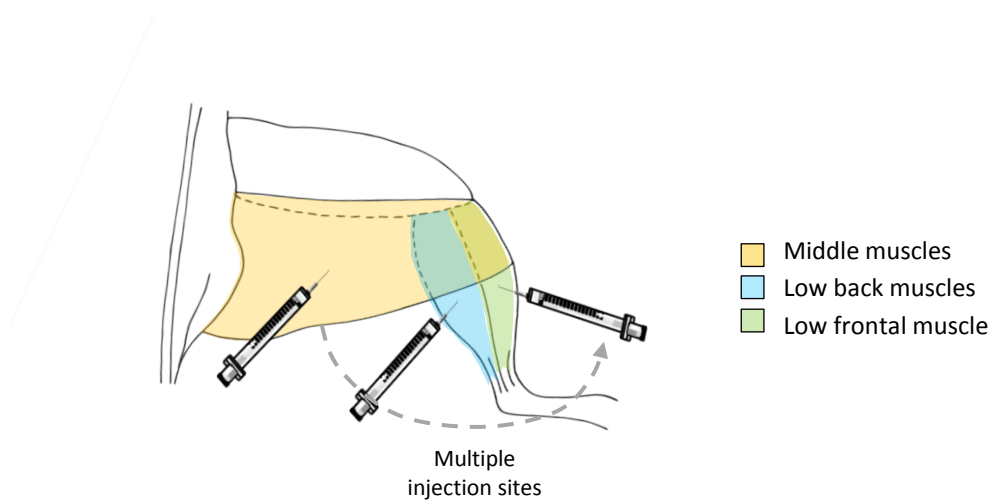

**Supplementary Figure S1: CACs administration sites and muscle extraction.** Mice received 3-4 intramuscular injections of either  $5 \cdot 10^5$  CACs or physiological serum (50  $\mu$ l in total) in different sites of the muscles surrounding the left femoral artery: low frontal muscles (tibialis), low back (gastrocnemius and soleus) and middle muscles (bicep femoris, adductor and semi-membranous). Low frontal muscles were used for IHC, while low back and middle muscles were kept for Alu-based quantification and proteomic analysis.

## Supplementary figure S2

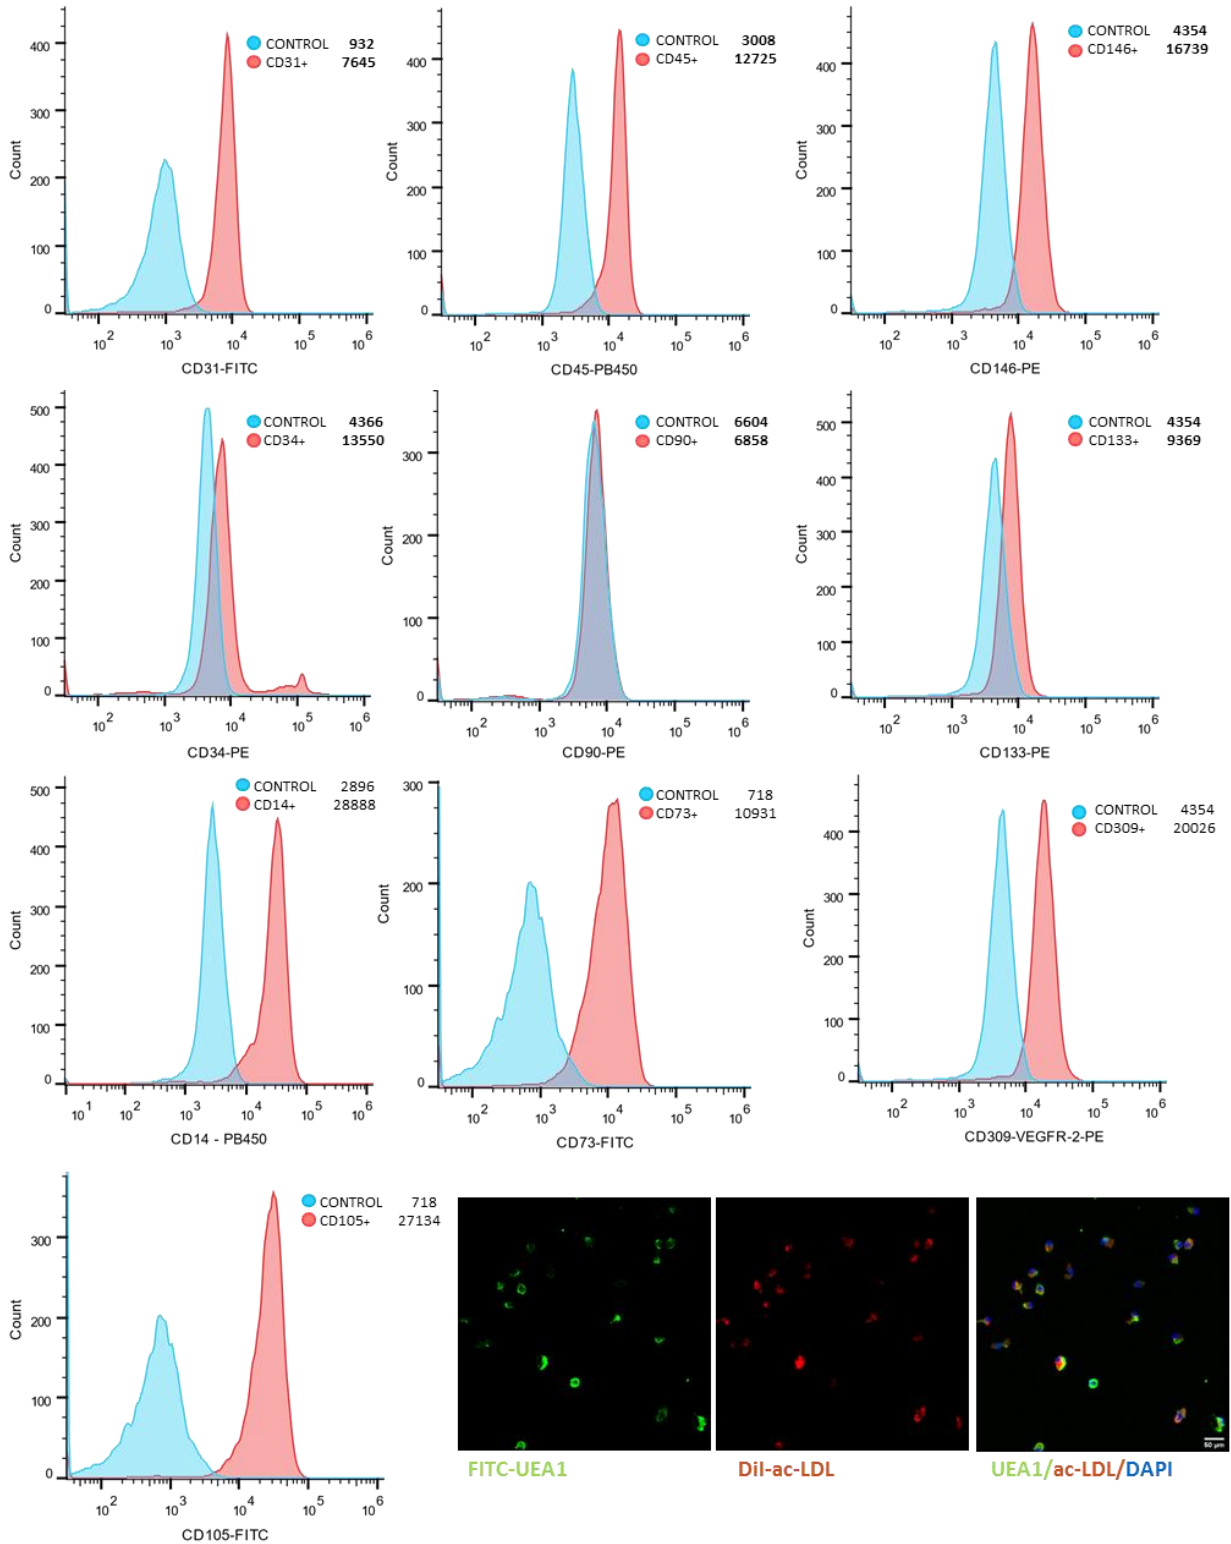

**Supplementary Figure S2: Characterization of cultured CACs.** Cells were isolated from PBMCs of healthy donors and cultured in fibronectin-coated plates. On day 7, cell identity was confirmed by flow cytometry, analyzing the following markers: CD31, CD34, CD45, CD90, CD73, CD105, CD309 (VEGFR2), CD133, CD146 and CD14. Specific isotype antibodies were used as negative controls. Data were presented as Mean Fluorescence Intensity (MFI), for both, the isotype control (blue) and positive markers analyzed (red). Additionally, CACs identity was also confirmed by IHC, with cells presenting double labeling with UEA1 and Ac-LDL uptake.

## Supplementary figure S3

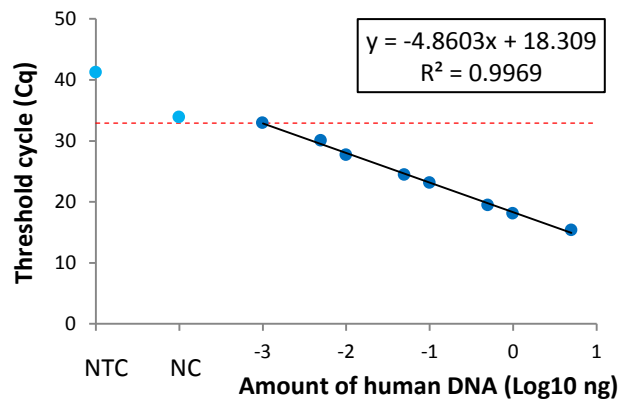

**Supplementary Figure S3: Standard curve for detecting human Alu sequence among the mice ischemic tissues.** A total of 100 ng of mixed human and mouse genomic DNA (known amounts) were used. Thus, decreasing amounts of human DNA (5, 1, 0.5, 0.1, 0.05, 0.01, 0.005 and 0.001 ng) were mixed with increasing amounts of mouse DNA (95, 99, 99.5, 99.9, 99.95, 99.990 and 99.999 ng). qPCR was performed using triplicates per samples in one run, and the mean Cq values were plotted. Additionally, a negative control (NC), with only mouse genomic DNA, and a non-template control (NTC) were used.

# Supplementary figure S4

SC2/SH

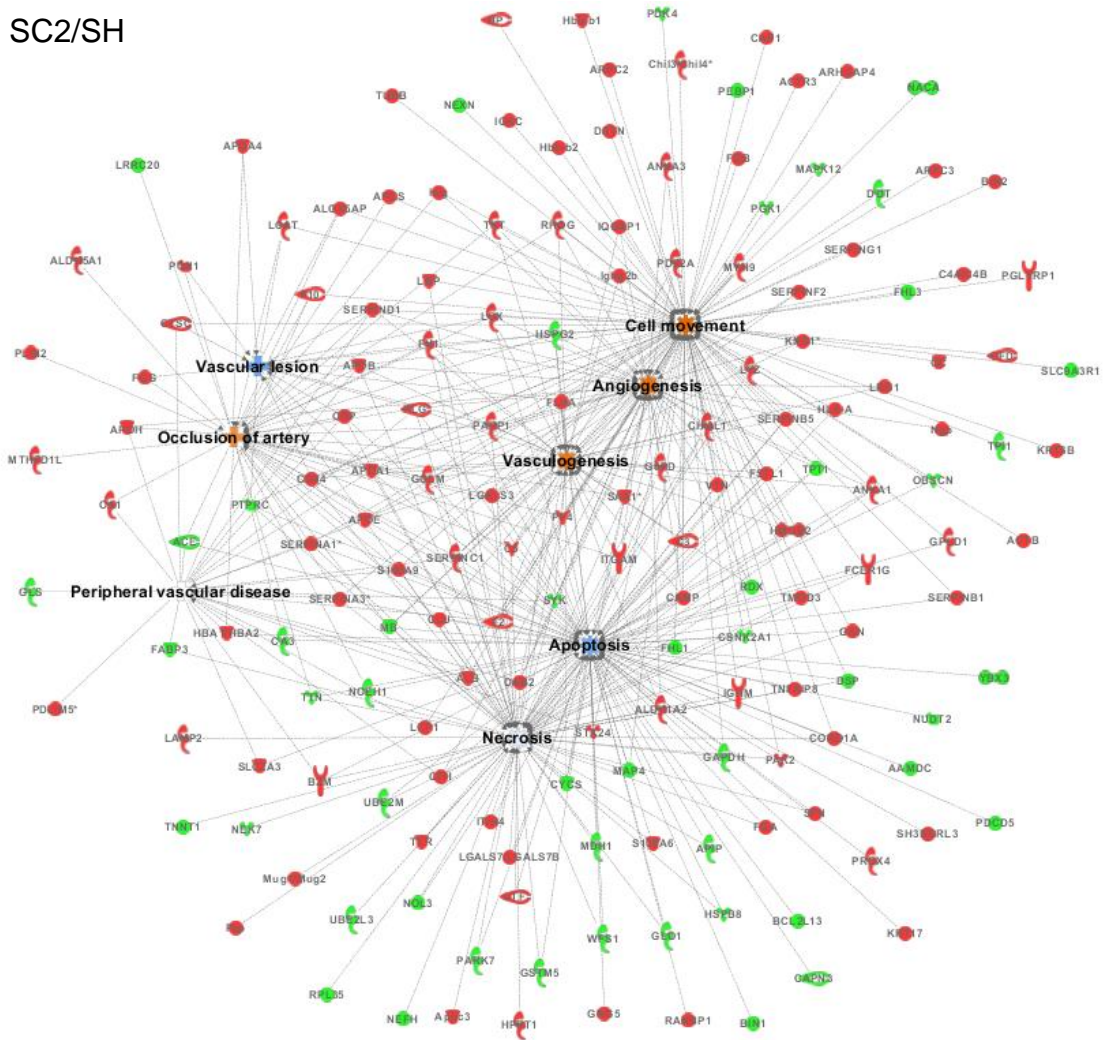

**Supplementary Figure S4. Graphical correlations between differentially expressed proteins and functions due to ischemia on day 2.** Major functions described for proteins with expression changes in ischemic non-treated mice (SC) on day 2 compared to sham mice (SH);  $p < 0.05$ . Pathways were obtained with the Ingenuity Pathway Analysis Software (IPA). Color legend: increased measurement (●), decreased measurement (●), predicted activation (more ● or less ● confidence) and predicted inhibition (more ● or less ● confidence)

# Supplementary figure S5

SC4/SH

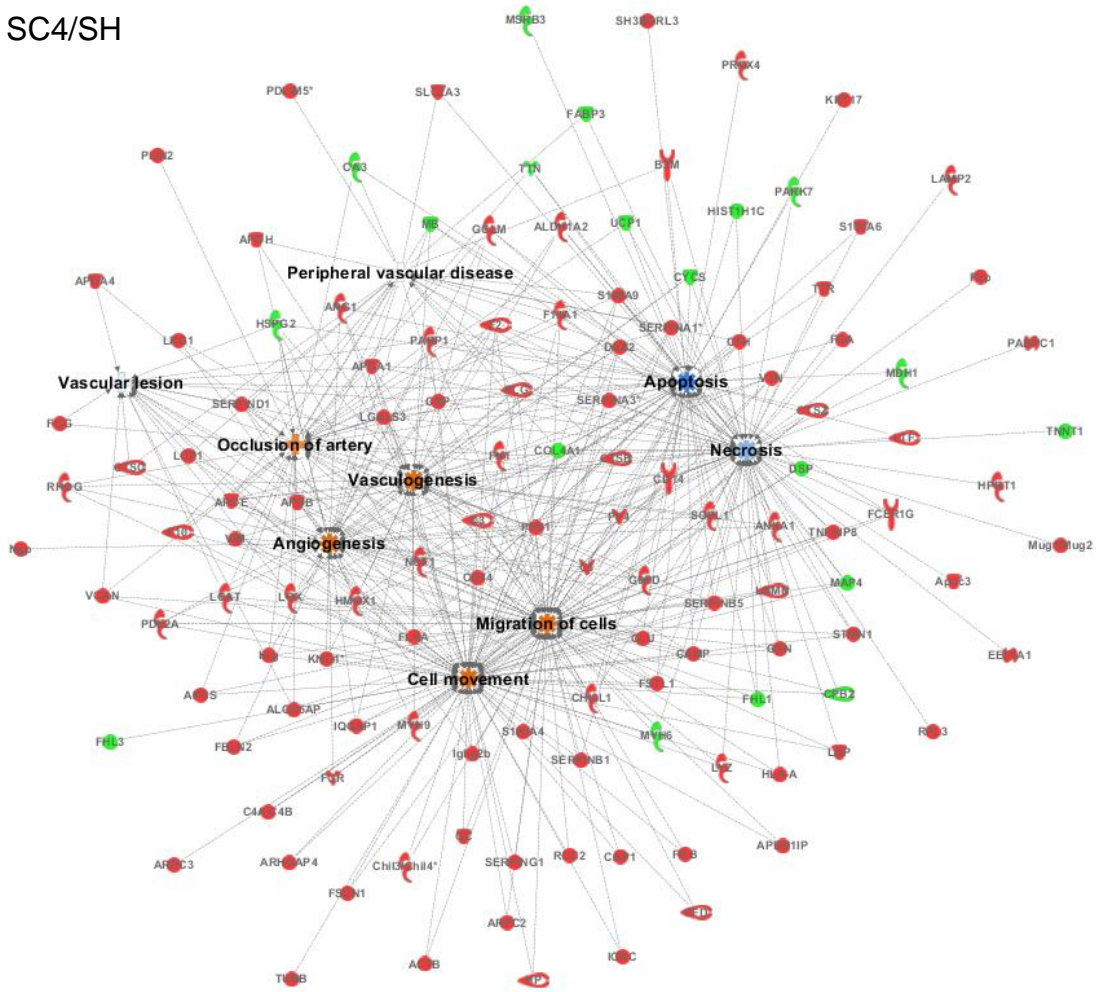

**Supplementary Figure S5. Graphical correlations between proteins differentially expressed and functions due to ischemia on day 4.** Major functions described for proteins with expression changes in ischemic non-treated mice (SC) on day 4 compared to sham mice (SH):  $p < 0.05$ . Pathways were obtained with the IPA software. Color legend: increased measurement (●), decreased measurement (●), predicted activation (more ● or less ● confidence) and predicted inhibition (more ● or less ● confidence)

**Supplementary Table 1. Quantitative comparison of proteins differentially expressed by ischemia on days 2 and 4 (SC vs SH).** The table includes (from left to right) Uniprot accession number, protein description, abundance ratio on days 2 and 4 (considering **up-regulated** ratio>1.5 and **down-regulated** ratio<0.6), P-value on days 2 and 4 (considering P-value<0.05 as **differentially significant**) and biological processes in which proteins are involved: Response to stimulus (RS), cell organization and biogenesis (COB), metabolic process (MP), regulation of biological process (RBP), transport (T), cell differentiation (CDif), cell death (CDe), cellular homeostasis (CH), coagulation (C), defense response (DR), cellular component movement (CCM), development (D), cell proliferation (CP), cell communication (CC), cell growth (CG) and cell division (CDiv).

| Accession  | Description                                    | Abundance ratio |           | P-value |         | Biological Process             |
|------------|------------------------------------------------|-----------------|-----------|---------|---------|--------------------------------|
|            |                                                | SC2/SH          | SC4/SH    | SC2/SH  | SC4/SH  |                                |
| A0A0B4J1H7 | Immunoglobulin kappa variable 1-135 (Fragment) | 100.00000       | 100.00000 | 0.00000 | 0.00000 | RS                             |
| P30355     | Arachidonate 5-lipoxygenase-activating protein | 8.47458         | 15.38462  | 0.00000 | 0.00001 | COB; MP; RBP; RS               |
| E9PV24     | Fibrinogen alpha chain                         | 8.92857         | 12.50000  | 0.00000 | 0.00004 | COB; C; DR; MP; RBP; RS        |
| Q62356     | Follistatin-related protein 1                  | 4.32900         | 8.26446   | 0.00040 | 0.00069 | RS; T                          |
| Q91X72     | Hemopexin                                      | 7.93651         | 10.10101  | 0.00000 | 0.00018 | CH; MP; RBP; T                 |
| P06728     | Apolipoprotein A-IV                            | 9.09091         | 5.84795   | 0.00000 | 0.00553 | COB; DR; MP; RBP; RS; T        |
| P07759     | Serine protease inhibitor A3K                  | 5.61798         | 5.88235   | 0.00003 | 0.00534 | RBP; RS                        |
| Q01339     | Beta-2-glycoprotein 1                          | 13.51351        | 23.80952  | 0.00000 | 0.00000 | C; MP; RBP; RS; T              |
| Q80Y14     | Glutaredoxin-related protein 5, mitochondrial  | 90.90909        | 40.00000  | 0.00000 | 0.00000 | CH; MP; RBP                    |
| P29788     | Vitronectin                                    | 5.26316         | 6.80272   | 0.00005 | 0.00235 | CDif; COB; RBP; RS; T          |
| Q00897     | Alpha-1-antitrypsin 1-4                        | 2.77778         | 7.29927   | 0.01423 | 0.00154 | RBP; RS                        |
| P31725     | Protein S100-A9                                | 90.90909        | 38.46154  | 0.00000 | 0.00000 | CDe; COB; CCM; DR; MP; RBP; RS |
| P07309     | Transthyretin                                  | 13.88889        | 10.98901  | 0.00000 | 0.00010 | MP; RBP; T                     |
| Q3UER8     | Fibrinogen gamma chain                         | 11.76471        | 22.72727  | 0.00000 | 0.00000 | COB; C; DR; MP; RBP; RS; T     |
| Q61838     | Pregnancy zone protein                         | 4.25532         | 4.65116   | 0.00045 | 0.01817 | RBP                            |
| Q00623     | Apolipoprotein A-I                             | 4.65116         | 6.06061   | 0.00019 | 0.00460 | COB; CP; CCM; MP; RBP; RS; T   |

|            |                                                                   |           |           |         |         |                                    |
|------------|-------------------------------------------------------------------|-----------|-----------|---------|---------|------------------------------------|
| P08226     | Apolipoprotein E                                                  | 3.33333   | 5.49451   | 0.00373 | 0.00792 | COB; CH; MP; RBP; RS; T            |
| P19221     | Prothrombin                                                       | 5.05051   | 6.28931   | 0.00008 | 0.00370 | CH; C; DR; MP; RBP; RS             |
| Q3U3V1     | Coagulation factor X                                              | 100.00000 | 100.00000 | 0.00000 | 0.00000 | C; MP; RBP                         |
| Q6S9I0     | Kininogen 2                                                       | 100.00000 | 100.00000 | 0.00000 | 0.00000 | CH; RBP                            |
| P39039     | Mannose-binding protein A                                         | 3.18471   | 5.29101   | 0.00521 | 0.00953 | COB; DR; MP; RBP; RS               |
| P20491     | High affinity immunoglobulin epsilon receptor subunit gamma       | 3.66300   | 4.71698   | 0.00189 | 0.01698 | CDif; COB; CCM; DR; MP; RBP; RS; T |
| Q8BTM8     | Filamin-A                                                         | 2.42718   | 3.95257   | 0.03448 | 0.03793 | COB; CCM; MP; RBP; RS; T           |
| P01029     | Complement C4-B                                                   | 3.25733   | 3.98406   | 0.00442 | 0.03688 | DR; MP; RBP; RS                    |
| Q99K85     | Phosphoserine aminotransferase                                    | 3.27869   | 8.40336   | 0.00487 | 0.00062 | MP                                 |
| P32037     | Solute carrier family 2, facilitated glucose transporter member 3 | 100.00000 | 100.00000 | 0.00000 | 0.00000 | T                                  |
| P08905     | Lysozyme C-2                                                      | 6.94444   | 16.39344  | 0.00000 | 0.00000 | DR; MP; RS                         |
| A2AL50     | Alkylglycerone-phosphate synthase                                 | 100.00000 | 100.00000 | 0.00000 | 0.00000 | MP                                 |
| Q9CQF3     | Cleavage and polyadenylation specificity factor subunit 5         | 100.00000 | 100.00000 | 0.00000 | 0.00000 | COB; MP                            |
| P70124     | Serpin B5                                                         | 100.00000 | 100.00000 | 0.00000 | 0.00000 | COB; RBP                           |
| Q80Z68     | Rho GTPase activating protein 4, isoform CRA_f                    | 100.00000 | 100.00000 | 0.00000 | 0.00000 | RBP; RS                            |
| Q91Z98     | Chitinase-like protein 4                                          | 8.13008   | 5.88235   | 0.00000 | 0.00950 | DR; MP; RS                         |
| P16301     | Phosphatidylcholine-sterol acyltransferase                        | 100.00000 | 100.00000 | 0.00000 | 0.00000 | COB; MP; RBP; RS; T                |
| Q9D7S7     | 60S ribosomal protein L22-like 1                                  | 100.00000 | 100.00000 | 0.00000 | 0.00000 | MP                                 |
| P01807     | Ig heavy chain V region X44                                       | 3.98406   | 14.49275  | 0.00082 | 0.00001 |                                    |
| Q62148     | Retinal dehydrogenase 2                                           | 100.00000 | 100.00000 | 0.00000 | 0.00000 | CDif; MP; RBP; RS                  |
| A0A0B4J110 | Immunoglobulin kappa variable 1-110                               | 100.00000 | 100.00000 | 0.00000 | 0.00000 | RS                                 |



## (Fragment)

|            |                                                                     |           |           |         |         |                            |
|------------|---------------------------------------------------------------------|-----------|-----------|---------|---------|----------------------------|
| O09172     | Glutamate--cysteine ligase regulatory subunit                       | 100.00000 | 100.00000 | 0.00000 | 0.00000 | COB; CH; MP; RBP; RS       |
| F7D3W5     | Phosphodiesterase                                                   | 100.00000 | 100.00000 | 0.00000 | 0.00000 | RBP; RS                    |
| A0A0G2JEA5 | Predicted gene 43738                                                | 100.00000 | 100.00000 | 0.00000 | 0.00000 | MP                         |
| Q8CI51     | PDZ and LIM domain protein 5                                        | 100.00000 | 100.00000 | 0.00000 | 0.00000 | CG; RBP                    |
| A0A2I3BRQ1 | Expressed sequence AI182371                                         | 100.00000 | 100.00000 | 0.00000 | 0.00000 |                            |
| D3Z312     | Tumor necrosis factor alpha-induced protein 8                       | 100.00000 | 100.00000 | 0.00000 | 0.00000 | MP; RBP                    |
| Q02105     | Complement C1q subcomponent subunit C                               | 100.00000 | 100.00000 | 0.00000 | 0.00000 | DR; MP; RBP; RS            |
| Q8K0E8     | Fibrinogen beta chain                                               | 15.62500  | 31.25000  | 0.00000 | 0.00000 | COB; C; DR; MP; RBP; RS    |
| Q8VDD5     | Myosin-9                                                            | 2.83286   | 5.18135   | 0.01245 | 0.01074 | CDif; COB; CCM; MP; RBP; T |
| Q9CPW4     | Actin-related protein 2/3 complex subunit 5                         | 3.44828   | 7.24638   | 0.00277 | 0.00159 | COB; CCM; RBP              |
| A2AMW0     | Capping protein (Actin filament) muscle Z-line, beta, isoform CRA_a | 100.00000 | 100.00000 | 0.00000 | 0.00000 | COB; RBP                   |
| Q91Z25     | Actin-related protein 2/3 complex subunit                           | 2.39808   | 4.44444   | 0.03738 | 0.02268 | COB; RBP                   |
| Q9CVB6     | Actin-related protein 2/3 complex subunit 2                         | 2.59740   | 4.92611   | 0.02266 | 0.01369 | COB; RBP; RS               |
| Q9Z126     | Platelet factor 4                                                   | 5.34759   | 28.57143  | 0.00004 | 0.00000 | COB; CCM; DR; RBP; RS      |
| A0A0R4J038 | Kininogen-1                                                         | 6.99301   | 10.00000  | 0.00000 | 0.00019 | CH; C; DR; RBP; RS         |
| B8JJN0     | Predicted gene 20547                                                | 8.33333   | 9.70874   | 0.00000 | 0.00023 | CP; DR; MP; RBP; RS        |
| Q61704     | Inter-alpha-trypsin inhibitor heavy chain H3                        | 3.25733   | 6.28931   | 0.00442 | 0.00374 | MP; RBP                    |
| P21614     | Vitamin D-binding protein                                           | 10.30928  | 14.49275  | 0.00000 | 0.00001 | MP; T                      |
| P12246     | Serum amyloid P-component                                           | 8.92857   | 9.80392   | 0.00000 | 0.00022 | COB; DR; RBP; RS           |
| P97290     | Plasma protease C1 inhibitor                                        | 5.98802   | 10.00000  | 0.00001 | 0.00019 | C; DR; MP; RBP; RS         |



|            |                                                      |           |           |         |         |                          |
|------------|------------------------------------------------------|-----------|-----------|---------|---------|--------------------------|
| Q60590     | Alpha-1-acid glycoprotein 1                          | 4.38596   | 5.98802   | 0.00033 | 0.00484 | DR; RBP; RS; T           |
| P03953     | Complement factor D                                  | 3.18471   | 4.09836   | 0.00525 | 0.03268 | DR; MP; RBP; RS          |
| E0CZ58     | Proteoglycan 4                                       | 2.41546   | 3.86100   | 0.03573 | 0.04198 | CP; RBP; RS; T           |
| P01887     | Beta-2-microglobulin                                 | 3.74532   | 5.15464   | 0.00140 | 0.01098 | CDif; DR; MP; RBP; RS; T |
| P97821     | Dipeptidyl peptidase 1                               | 100.00000 | 100.00000 | 0.00000 | 0.00000 | CDe; MP; RBP; RS         |
| Q9Z1Q5     | Chloride intracellular channel protein 1             | 2.81690   | 6.28931   | 0.01286 | 0.00367 | MP; RBP; T               |
| P45377     | Aldose reductase-related protein 2                   | 100.00000 | 100.00000 | 0.00000 | 0.00000 | MP                       |
| P14069     | Protein S100-A6                                      | 5.74713   | 7.19424   | 0.00002 | 0.00172 | T                        |
| Q8BWM3     | MCG130173                                            | 100.00000 | 100.00000 | 0.00000 | 0.00000 | RBP                      |
| P59999     | Actin-related protein 2/3 complex subunit 4          | 2.64550   | 4.32900   | 0.01978 | 0.02534 | COB; RBP                 |
| A0A0A0MQA3 | Alpha-1-antitrypsin 1-1                              | 4.23729   | 4.80769   | 0.00047 | 0.01528 | MP; RS                   |
| A0A1W2P6X3 | Formin-like protein 1                                | 100.00000 | 100.00000 | 0.00000 | 0.00000 | COB; CCM; RBP            |
| G3X8Q5     | Ceruloplasmin                                        | 5.71429   | 7.35294   | 0.00002 | 0.00150 | CH; MP; RS; T            |
| O08692     | Neutrophilic granule protein                         | 22.22222  | 12.19512  | 0.00000 | 0.00004 | DR; RBP; RS              |
| O89020     | Afamin                                               | 6.75676   | 5.81395   | 0.00000 | 0.00582 | T                        |
| P50543     | Protein S100-A11                                     | 7.93651   | 8.47458   | 0.00000 | 0.00060 | RBP                      |
| Q91XL1     | Leucine-rich HEV glycoprotein                        | 12.65823  | 7.87402   | 0.00000 | 0.00098 | CDif; RBP                |
| P29699     | Alpha-2-HS-glycoprotein                              | 5.31915   | 5.78035   | 0.00005 | 0.00586 | COB; DR; RBP; RS         |
| O35744     | Chitinase-like protein 3                             | 3.28947   | 4.38596   | 0.00406 | 0.02373 | DR; MP; RS               |
| Q91VW3     | SH3 domain-binding glutamic acid-rich-like protein 3 | 3.59712   | 5.74713   | 0.00200 | 0.00622 | CH; MP; RBP              |
| P14847     | C-reactive protein                                   | 100.00000 | 100.00000 | 0.00000 | 0.00000 | COB; DR; MP; RBP; RS     |

|            |                                                  |           |           |         |         |                                    |
|------------|--------------------------------------------------|-----------|-----------|---------|---------|------------------------------------|
| P01867     | Ig gamma-2B chain C region                       | 100.00000 | 100.00000 | 0.00000 | 0.00000 | COB; DR; MP; RBP; RS               |
| A0A1Y7VJN6 | Immunoglobulin heavy constant gamma 3 (Fragment) | 3.48432   | 6.25000   | 0.00256 | 0.00388 |                                    |
| P16110     | Galectin-3                                       | 4.97512   | 14.70588  | 0.00009 | 0.00001 | CDif; COB; CCM; DR; MP; RBP; RS    |
| A0A087WR50 | Fibronectin                                      | 5.58659   | 11.36364  | 0.00003 | 0.00007 | CDif; COB; CCM; DR; MP; RBP; RS    |
| P28665     | Murinoglobulin-1                                 | 5.31915   | 8.69565   | 0.00005 | 0.00050 | RBP                                |
| Q00612     | Glucose-6-phosphate 1-dehydrogenase X            | 3.10559   | 4.90196   | 0.00638 | 0.01393 | MP; RBP; RS                        |
| P20918     | Plasminogen                                      | 12.50000  | 20.83333  | 0.00000 | 0.00000 | CDif; COB; CCM; CH; C; MP; RBP     |
| E9Q8I0     | Complement factor H                              | 5.58659   | 6.89655   | 0.00003 | 0.00218 | DR; MP; RBP; RS                    |
| P60710     | Actin, cytoplasmic 1                             | 2.58398   | 5.29101   | 0.02345 | 0.00958 | COB; RS                            |
| P51437     | Cathelicidin antimicrobial peptide               | 14.28571  | 8.77193   | 0.00000 | 0.00047 | DR; RBP; RS                        |
| P01027     | Complement C3                                    | 7.57576   | 8.06452   | 0.00000 | 0.00083 | COB; C; DR; MP; RBP; RS            |
| Q9JKF1     | Ras GTPase-activating-like protein IQGAP1        | 2.48756   | 4.09836   | 0.02978 | 0.03276 | CG; RBP; RS                        |
| Q61233     | Plastin-2                                        | 6.57895   | 10.41667  | 0.00000 | 0.00015 | COB; CCM; RBP; RS                  |
| P10107     | Annexin A1                                       | 7.51880   | 9.17431   | 0.00000 | 0.00036 | CDif; COB; CCM; DR; MP; RBP; RS; T |
| Q61646     | Haptoglobin                                      | 11.76471  | 11.11111  | 0.00000 | 0.00009 | DR; MP; RBP; RS                    |
| Q91WP6     | Serine protease inhibitor A3N                    | 15.87302  | 13.51351  | 0.00000 | 0.00002 | DR; RBP; RS                        |
| P13020     | Gelsolin                                         | 4.34783   | 4.71698   | 0.00036 | 0.01692 | CDe; COB; MP; RBP; RS; T           |
| P40124     | Adenylyl cyclase-associated protein 1            | 3.43643   | 4.60829   | 0.00289 | 0.01909 | COB; CCM; RBP; RS; T               |
| A0A0R4J039 | Histidine-rich glycoprotein                      | 11.62791  | 16.66667  | 0.00000 | 0.00000 | C; DR; RBP; RS; T                  |
| P22599     | Alpha-1-antitrypsin 1-2                          | 5.71429   | 6.71141   | 0.00002 | 0.00251 | DR; MP; RBP; RS                    |
| E9Q414     | Apolipoprotein B-100                             | 100.00000 | 100.00000 | 0.00000 | 0.00000 | COB; CCM; MP; RBP; RS; T           |

|            |                                                       |           |           |         |         |                            |
|------------|-------------------------------------------------------|-----------|-----------|---------|---------|----------------------------|
| P31532     | Serum amyloid A-4 protein                             | 7.75194   | 14.49275  | 0.00000 | 0.00001 | CCM; DR; RS                |
| E9Q035     | Predicted gene 20425                                  | 5.12821   | 5.07614   | 0.00007 | 0.01174 | RBP; RS                    |
| P70698     | CTP synthase 1                                        | 100.00000 | 100.00000 | 0.00000 | 0.00000 | CP; MP                     |
| Q61362     | Chitinase-3-like protein 1                            | 100.00000 | 100.00000 | 0.00000 | 0.00000 | CDe; DR; MP; RBP; RS; T    |
| P34928     | Apolipoprotein C-I                                    | 8.33333   | 13.88889  | 0.00000 | 0.00002 | COB; MP; RBP; T            |
| E9QP56     | Apolipoprotein C-III                                  | 10.63830  | 16.39344  | 0.00000 | 0.00000 | COB; CH; MP; RBP; RS; T    |
| E9Q6I2     | Interleukin-1 receptor accessory protein              | 6.57895   | 5.95238   | 0.00000 | 0.00510 | DR; MP; RBP; RS; T         |
| Q9CYL5     | Golgi-associated plant pathogenesis-related protein 1 | 100.00000 | 100.00000 | 0.00000 | 0.00000 | RBP                        |
| F8WHQ1     | Tumor protein D52                                     | 100.00000 | 100.00000 | 0.00000 | 0.00000 | CDif; RBP                  |
| AOAOR4J0M4 | Apolipoprotein F                                      | 100.00000 | 100.00000 | 0.00000 | 0.00000 | MP; T                      |
| P49222     | Erythrocyte membrane protein band 4.2                 | 100.00000 | 100.00000 | 0.00000 | 0.00000 | COB; MP; RBP               |
| P23953     | Carboxylesterase 1C                                   | 8.54701   | 5.49451   | 0.00000 | 0.00780 | MP                         |
| P06684     | Complement C5                                         | 2.93255   | 4.83092   | 0.00973 | 0.01509 | DR; MP; RBP; RS            |
| P00493     | Hypoxanthine-guanine phosphoribosyltransferase        | 2.73224   | 5.18135   | 0.01593 | 0.01067 | CDif; COB; CP; MP; RBP; RS |
| Q8BVE3     | V-type proton ATPase subunit H                        | 4.03226   | 4.60829   | 0.00074 | 0.01914 | CH; T                      |
| P51910     | Apolipoprotein D                                      | 2.55754   | 3.75940   | 0.02500 | 0.04720 | COB; MP; RBP; RS; T        |
| Q2M2N2     | Speckle-type POZ protein-like                         | 11.23596  | 11.62791  | 0.00000 | 0.00006 | MP; RBP                    |
| Q9D154     | Leukocyte elastase inhibitor A                        | 4.13223   | 4.83092   | 0.00057 | 0.01512 | RBP                        |
| Q07456     | Protein AMBP                                          | 9.43396   | 9.00901   | 0.00000 | 0.00039 | MP; RBP                    |
| Q9JM76     | Actin-related protein 2/3 complex subunit 3           | 2.48756   | 3.83142   | 0.02991 | 0.04365 | COB; RBP; RS               |
| Q05020     | Apolipoprotein C-II                                   | 4.38596   | 5.26316   | 0.00033 | 0.00982 | MP; RBP; T                 |

|            |                                                |           |           |         |         |                               |
|------------|------------------------------------------------|-----------|-----------|---------|---------|-------------------------------|
| P54116     | Erythrocyte band 7 integral membrane protein   | 3.75940   | 5.68182   | 0.00261 | 0.01133 | COB; RBP                      |
| A0A1W2P7Q9 | Myosin light polypeptide 6                     | 2.35294   | 4.06504   | 0.04162 | 0.03383 | CCM                           |
| P84096     | Rho-related GTP-binding protein RhoG           | 2.39808   | 5.68182   | 0.03724 | 0.00651 | COB; CCM; RBP; RS             |
| O08807     | Peroxiredoxin-4                                | 100.00000 | 100.00000 | 0.00000 | 0.00000 | COB; CH; MP; RBP              |
| P50172     | Corticosteroid 11-beta-dehydrogenase isozyme 1 | 2.46914   | 4.42478   | 0.04740 | 0.04157 | MP; RBP                       |
| Q06890     | Clusterin                                      | 3.87597   | 5.78035   | 0.00103 | 0.00600 | COB; CP; MP; RBP; RS; T       |
| P26262     | Plasma kallikrein                              | 3.50877   | 6.75676   | 0.00241 | 0.00246 | C; DR; MP; RBP; RS            |
| G3UXA6     | Polypyrimidine tract-binding protein 3         | 2.67380   | 5.98802   | 0.02118 | 0.00498 | CDif; MP; RBP                 |
| Q61805     | Lipopolysaccharide-binding protein             | 2.81690   | 4.73934   | 0.01307 | 0.01639 | CCM; DR; RBP; RS; T           |
| P99024     | Tubulin beta-5 chain                           | 2.53165   | 6.02410   | 0.02658 | 0.00481 | COB                           |
| P01837     | Immunoglobulin kappa constant                  | 3.08642   | 7.40741   | 0.00669 | 0.00138 |                               |
| P08071     | Lactotransferrin                               | 9.09091   | 6.36943   | 0.00000 | 0.00341 | DR; MP; RBP; RS; T            |
| P49182     | Heparin cofactor 2                             | 3.30033   | 5.15464   | 0.00402 | 0.01087 | C; RBP                        |
| P43883     | Perilipin-2                                    | 11.90476  | 7.69231   | 0.00000 | 0.00114 | RS; T                         |
| P46664     | Adenylosuccinate synthetase isozyme 2          | 4.29185   | 8.40336   | 0.00047 | 0.00063 | MP; RS                        |
| A0A0R4J104 | Disabled homolog 2                             | 5.81395   | 9.09091   | 0.00004 | 0.00037 | CDe; CDif; COB; D; RBP; RS; T |
| P28301     | Protein-lysine 6-oxidase                       | 3.26797   | 9.25926   | 0.00482 | 0.00033 | COB; MP; RS                   |
| P07361     | Alpha-1-acid glycoprotein 2                    | 14.92537  | 16.39344  | 0.00000 | 0.00000 | DR; RBP; RS; T                |
| P47968     | Ribose-5-phosphate isomerase                   | 3.66300   | 6.13497   | 0.00183 | 0.00432 | MP                            |
| Q8BFZ3     | Beta-actin-like protein 2                      | 8.06452   | 7.69231   | 0.00000 | 0.00173 |                               |
| Q9QWL7     | Keratin, type I cytoskeletal 17                | 2.65252   | 4.54545   | 0.01971 | 0.02042 | COB; RBP; RS                  |

|        |                                                         |           |           |         |         |                               |
|--------|---------------------------------------------------------|-----------|-----------|---------|---------|-------------------------------|
| P01786 | Ig heavy chain V region MOPC 47A                        | 3.92157   | 5.40541   | 0.00162 | 0.00855 |                               |
| P01898 | H-2 class I histocompatibility antigen, Q10 alpha chain | 2.31481   | 4.38596   | 0.04637 | 0.02404 |                               |
| P47753 | F-actin-capping protein subunit alpha-1                 | 2.58398   | 3.77358   | 0.02339 | 0.04657 | COB; RBP                      |
| A2APM2 | CD44 antigen                                            | 4.56621   | 4.31034   | 0.00023 | 0.02590 | COB; CCM; MP; RBP; RS         |
| P17047 | Lysosome-associated membrane glycoprotein 2             | 3.12500   | 5.88235   | 0.00607 | 0.00542 | CC; COB; CH; MP; RBP; RS; T   |
| Q3UV17 | Keratin, type II cytoskeletal 2 oral                    | 3.93701   | 7.63359   | 0.00090 | 0.00117 |                               |
| Q7TPV4 | Myb-binding protein 1A                                  | 2.97619   | 4.90196   | 0.00870 | 0.01391 | CC; CDif; MP; RBP; RS; T      |
| Q921K2 | Poly [ADP-ribose] polymerase                            | 100.00000 | 100.00000 | 0.00000 | 0.00000 | CDe; COB; MP; RBP; RS         |
| Q3THE2 | Myosin regulatory light chain 12B                       | 2.13675   | 3.92157   | 0.07232 | 0.03959 | RBP                           |
| Q8VIJ6 | Splicing factor, proline- and glutamine-rich            | 2.27790   | 4.65116   | 0.05047 | 0.01798 | COB; DR; MP; RBP; RS          |
| P01865 | Ig gamma-2A chain C region, membrane-bound form         | 1.95695   | 14.08451  | 0.13966 | 0.00001 | COB; DR; MP; RBP; RS; T       |
| Q61702 | Inter-alpha-trypsin inhibitor heavy chain H1            | 2.26244   | 4.76190   | 0.05273 | 0.01613 | MP; RBP                       |
| Q62059 | Versican core protein                                   | 1.76678   | 4.48430   | 0.18606 | 0.02149 | CDif; CCM; RBP                |
| P10126 | Elongation factor 1-alpha 1                             | 2.12314   | 5.68182   | 0.07482 | 0.00648 | COB; MP; RBP; RS              |
| P62962 | Profilin-1                                              | 2.20751   | 3.95257   | 0.06034 | 0.03793 | COB; RBP; RS                  |
| Q8BH61 | Coagulation factor XIII A chain                         | 1.60514   | 5.05051   | 0.27854 | 0.01200 | C; MP; RS                     |
| P20152 | Vimentin                                                | 1.64745   | 4.34783   | 0.25105 | 0.02485 | CDif; COB; MP; RBP; RS        |
| P14901 | Heme oxygenase 1                                        | 2.22222   | 7.14286   | 0.05854 | 0.00174 | CC; CDe; COB; CH; MP; RBP; RS |
| P27659 | 60S ribosomal protein L3                                | 1.59744   | 5.00000   | 0.28448 | 0.01277 | COB; MP; RS                   |
| Q8BK67 | Protein RCC2                                            | 2.05761   | 4.34783   | 0.10964 | 0.02470 | CDiv; COB; RBP; RS            |
| Q922I7 | MCG13402, isoform CRA_c                                 | 1.61551   | 4.44444   | 0.27229 | 0.02235 | MP; RBP                       |

|        |                                                      |          |         |         |         |                             |
|--------|------------------------------------------------------|----------|---------|---------|---------|-----------------------------|
| P29341 | Polyadenylate-binding protein 1                      | 1.52672  | 3.95257 | 0.33945 | 0.03837 | MP; RBP                     |
| Q6IRU2 | Tropomyosin alpha-4 chain                            | 2.17865  | 4.46429 | 0.06540 | 0.02209 | CDif; COB                   |
| Q9R0E2 | Procollagen-lysine,2-oxoglutarate 5-dioxygenase<br>1 | 1.77620  | 5.29101 | 0.21181 | 0.00963 | MP; RS                      |
| P14234 | Tyrosine-protein kinase Fgr                          | 2.17391  | 4.73934 | 0.06604 | 0.01653 | CDif; DR; MP; RBP; RS       |
| P43275 | Histone H1.1                                         | 2.17865  | 5.18135 | 0.06529 | 0.01055 | COB; RBP                    |
| Q64674 | Spermidine synthase                                  | 1.74520  | 4.40529 | 0.19635 | 0.02349 | MP                          |
| Q9WUU7 | Cathepsin Z                                          | 2.05339  | 5.64972 | 0.08954 | 0.00678 | MP; RBP                     |
| E9PW66 | Nucleosome assembly protein 1-like 1                 | 1.98413  | 4.09836 | 0.10750 | 0.03269 | COB                         |
| O89086 | RNA-binding protein 3                                | 1.53846  | 3.77358 | 0.32806 | 0.04673 | MP; RBP; RS                 |
| Q922Q8 | Leucine-rich repeat-containing protein 59            | 1.52672  | 4.14938 | 0.33793 | 0.03084 |                             |
| Q8R0X7 | Sphingosine-1-phosphate lyase 1                      | 1.66667  | 4.54545 | 0.24695 | 0.02026 | CDe; CDif; CCM; MP; RBP; RS |
| P54227 | Stathmin                                             | 1.75747  | 4.62963 | 0.19307 | 0.01836 | CDif; COB; D; RBP; RS       |
| P10810 | Monocyte differentiation antigen CD14                | 1.68350  | 4.97512 | 0.24376 | 0.02313 | DR; RBP; RS; T              |
| Q9JM83 | Calmodulin-4                                         | 8.13008  | 2.37530 | 0.00000 | 0.34156 | RBP; RS                     |
| Q3U1U4 | Integrin alpha-M                                     | 2.87356  | 3.38983 | 0.01134 | 0.07210 | COB; CP; CCM; MP; RBP; RS   |
| P32261 | Antithrombin-III                                     | 6.13497  | 1.68067 | 0.00001 | 0.58419 | C; DR; RBP; RS; T           |
| O88593 | Peptidoglycan recognition protein 1                  | 2.70270  | 3.64964 | 0.02887 | 0.09224 | CDe; DR; MP; RBP; RS        |
| P05366 | Serum amyloid A-1 protein                            | 11.76471 | 2.65957 | 0.00000 | 0.17257 | CCM; DR; MP; RS             |
| P05367 | Serum amyloid A-2 protein                            | 21.27660 | 3.67647 | 0.00000 | 0.07484 | CCM; DR; RS                 |
| D3Z5G7 | Carboxylic ester hydrolase                           | 4.06504  | 3.17460 | 0.00067 | 0.09274 | MP                          |
| Q8BND5 | Sulfhydryl oxidase 1                                 | 4.23729  | 3.55872 | 0.00046 | 0.05974 | CH; MP; RBP                 |

|        |                                              |         |         |         |         |                               |
|--------|----------------------------------------------|---------|---------|---------|---------|-------------------------------|
| Q9QXC1 | Fetuin-B                                     | 5.58659 | 3.08642 | 0.00003 | 0.10233 | RBP                           |
| P07724 | Serum albumin                                | 5.29101 | 3.22581 | 0.00005 | 0.08750 | CC; RBP; RS; T                |
| P04919 | Band 3 anion transport protein               | 3.08642 | 3.17460 | 0.00666 | 0.09237 | COB; CH; RBP; RS; T           |
| P02088 | Hemoglobin subunit beta-1                    | 4.13223 | 3.08642 | 0.00058 | 0.10240 | RBP; T                        |
| P02089 | Hemoglobin subunit beta-2                    | 3.62319 | 3.06748 | 0.00189 | 0.10455 | RBP; RS; T                    |
| E9PVD2 | Inter alpha-trypsin inhibitor, heavy chain 4 | 4.32900 | 3.46021 | 0.00037 | 0.06651 | DR; MP; RBP; RS               |
| P40142 | Transketolase                                | 2.70270 | 3.18471 | 0.01739 | 0.09195 | MP; RBP                       |
| P01872 | Immunoglobulin heavy constant mu             | 3.49650 | 3.11526 | 0.00252 | 0.09962 | COB; DR; MP; RBP; RS; T       |
| P01942 | Hemoglobin subunit alpha                     | 3.00300 | 2.23714 | 0.00812 | 0.29059 | RS; T                         |
| O35639 | Annexin A3                                   | 2.53807 | 2.73973 | 0.02623 | 0.15565 | DR; RBP; RS; T                |
| P46412 | Glutathione peroxidase 3                     | 2.61780 | 3.47222 | 0.02134 | 0.06545 | COB; MP; RS                   |
| Q99JY9 | Actin-related protein 3                      | 2.47525 | 3.70370 | 0.03041 | 0.05035 | CDif; CDiv; COB; CCM; RBP; RS |
| Q3UHZ7 | UDP-N-acetylhexosamine pyrophosphorylase     | 3.16456 | 3.34448 | 0.00974 | 0.10584 | MP                            |
| P30681 | High mobility group protein B2               | 2.42131 | 2.00000 | 0.03521 | 0.38995 | COB; CCM; DR; MP; RBP; RS     |
| P62806 | Histone H4                                   | 2.50627 | 3.03951 | 0.02840 | 0.10920 | COB; MP; RBP                  |
| Q9R0P5 | Dextrin                                      | 2.58398 | 3.41297 | 0.02345 | 0.06991 | COB; CCM; RBP                 |
| O89053 | Coronin-1A                                   | 2.70270 | 2.34192 | 0.01716 | 0.25456 | COB; CCM; RBP; RS; T          |
| Q61247 | Alpha-2-antiplasmin                          | 2.46305 | 2.40964 | 0.03160 | 0.23464 | COB; DR; RBP; RS              |
| Q497J0 | MCG130175, isoform CRA_b                     | 4.50450 | 2.94118 | 0.00025 | 0.12234 | RBP                           |
| Q9Z1F9 | SUMO-activating enzyme subunit 2             | 2.91545 | 2.07469 | 0.01013 | 0.41286 | MP                            |
| P52430 | Serum paraoxonase/arylesterase 1             | 3.17460 | 3.50877 | 0.00543 | 0.06294 | MP; RBP; RS                   |
| Q80SZ7 | Guanine nucleotide-binding protein           | 3.69004 | 3.31126 | 0.00159 | 0.07881 | RBP; RS                       |



## G(I)/G(S)/G(O) subunit gamma-5

|            |                                                            |         |           |         |         |                            |
|------------|------------------------------------------------------------|---------|-----------|---------|---------|----------------------------|
| P34022     | Ran-specific GTPase-activating protein                     | 2.84900 | 3.57143   | 0.01197 | 0.05841 | COB; MP; RBP; RS; T        |
| P08032     | Spectrin alpha chain, erythrocytic 1                       | 2.69542 | 1.90114   | 0.01752 | 0.44285 | COB; MP; RBP               |
| Q06770     | Corticosteroid-binding globulin                            | 4.21941 | 2.30947   | 0.00049 | 0.26564 | MP; RBP; T                 |
| P13634     | Carbonic anhydrase 1                                       | 2.73973 | 1.91939   | 0.01561 | 0.43210 | MP                         |
| Q6P069     | Sorcin                                                     | 2.47525 | 3.21543   | 0.03050 | 0.08856 | MP; RBP; T                 |
| Q9CPX8     | Cytochrome b-c1 complex subunit 10                         | 2.85714 | 3.50877   | 0.02121 | 0.10763 | MP; T                      |
| E9PVA8     | eIF-2-alpha kinase activator GCN1                          | 3.03030 | 3.10559   | 0.01362 | 0.14444 | CC; RBP; RS                |
| A0A1L1SRX2 | AMP deaminase                                              | 4.56621 | 2.79330   | 0.00027 | 0.18312 | MP                         |
| S4R270     | Bridging integrator 2                                      | 2.63158 | 2.81690   | 0.02886 | 0.15432 | COB; CCM; RS               |
| Q9JHJ0     | Tropomodulin-3                                             | 2.56410 | 3.32226   | 0.03081 | 0.10538 | COB; RBP                   |
| Q8CIN4     | Serine/threonine-protein kinase PAK 2                      | 2.53807 | 3.41297   | 0.02629 | 0.07060 | CDe; COB; CCM; MP; RBP; RS |
| Q99KH8     | Serine/threonine-protein kinase 24                         | 2.53165 | 2.62467   | 0.04217 | 0.23102 | CC; CDe; COB; MP; RBP; RS  |
| Q9ERE7     | LRP chaperone MESD                                         | 3.47222 | 2.45700   | 0.00264 | 0.23688 | MP; RBP; RS; T             |
| Q3V3R1     | Monofunctional C1-tetrahydrofolate synthase, mitochondrial | 2.94118 | 2.40964   | 0.00962 | 0.23399 | MP                         |
| A0A0R4IZY0 | Thimet oligopeptidase                                      | 4.16667 | 1.61290   | 0.00054 | 0.63568 | MP; RBP; RS                |
| Q8VCU2     | Glycosylphosphatidylinositol specific phospholipase D1     | 2.29358 | 2.49377   | 0.04834 | 0.21132 | CDif; CCM; MP; RBP; RS; T  |
| Q8VC88     | Grancalcin                                                 |         | 100.00000 |         | 0.00000 | MP                         |
| Q6ZQM8     | UDP-glucuronosyltransferase 1-7C                           | 0.58858 | 4.21941   | 0.16649 | 0.02839 | MP                         |
| Q8BJY1     | 26S proteasome non-ATPase regulatory subunit 5             |         | 100.00000 |         | 0.00000 | COB                        |
| Q9ES74     | Serine/threonine-protein kinase Nek7                       | 0.26824 | 1.70068   | 0.00080 | 0.56993 | MP; RBP                    |

|            |                                                                                 |           |         |         |         |                                         |
|------------|---------------------------------------------------------------------------------|-----------|---------|---------|---------|-----------------------------------------|
| Q6ZVV7     | 60S ribosomal protein L35                                                       | 0.45475   | 1.56006 | 0.03917 | 0.67892 | MP; RS                                  |
| P37889     | Fibulin-2                                                                       | 1.29199   | 8.47458 | 0.63540 | 0.00060 | COB; RBP                                |
| P35173     | Stefin-3                                                                        | 0.98039   | 3.78788 | 0.88367 | 0.04596 | RBP                                     |
| F8WH69     | Neutrophil cytosol factor 1                                                     | 1.45773   | 4.42478 | 0.39934 | 0.02290 | CDe; COB; CP; DR; MP; RBP; RS; T        |
| Q61176     | Arginase-1                                                                      | 1.30890   | 5.00000 | 0.56645 | 0.01273 | COB; DR; MP; RBP; RS                    |
| O89017     | Legumain                                                                        | 1.36986   | 5.37634 | 0.50006 | 0.00882 | MP; RBP; RS                             |
| E9Q0F0     | Keratin 78                                                                      | 1.25786   | 6.06061 | 0.64019 | 0.00457 | COB; CCM; MP; RBP; T                    |
| P61924     | Coatomer subunit zeta-1                                                         | 0.87260   | 4.14938 | 0.65356 | 0.03076 | T                                       |
| P10605     | Cathepsin B                                                                     | 1.13122   | 3.96825 | 0.83383 | 0.03749 | CDif; MP; RBP; RS                       |
| P07091     | Protein S100-A4                                                                 | 1.28866   | 4.25532 | 0.59398 | 0.02749 | RBP                                     |
| Q3TWW8     | Serine/arginine-rich splicing factor 6                                          | 1.48148   | 5.05051 | 0.37699 | 0.01198 | COB; MP; RBP; RS                        |
| Q61553     | Fascin                                                                          | 1.49477   | 3.77358 | 0.36602 | 0.04636 | COB; CCM; RBP                           |
| Q8R5A3     | Amyloid beta A4 precursor protein-binding family B member 1-interacting protein | 1.18203   | 4.71698 | 0.79261 | 0.01818 | RBP; RS                                 |
| Q9Z331     | Keratin, type II cytoskeletal 6B                                                | 100.00000 |         | 0.00000 |         | COB; MP                                 |
| P00848     | ATP synthase subunit a                                                          | 100.00000 |         | 0.00000 |         | MP; RS; T                               |
| P20060     | Beta-hexosaminidase subunit beta                                                | 1.95313   |         | 0.12545 |         | COB; CCM; CH; MP; RBP; reproduction; RS |
| P70195     | Proteasome subunit beta type-7                                                  | 3.31126   | 1.31062 | 0.00392 | 0.91686 | MP                                      |
| O70456     | 14-3-3 protein sigma                                                            | 2.47525   | 0.81500 | 0.03074 | 0.39282 | CDif; COB; RBP; RS                      |
| A0A1B0GRV0 | 3'(2'),5'-bisphosphate nucleotidase 1                                           | 3.03030   | 1.32450 | 0.00770 | 0.90118 | MP                                      |
| Q9CRB1     | Galectin                                                                        | 2.63852   | 0.68823 | 0.02026 | 0.29668 | CDe                                     |
| A0A140T8T7 | Collagen alpha-5(VI) chain                                                      | 6.13497   | 1.15075 | 0.00002 | 0.78315 |                                         |

|        |                                                     |         |         |         |         |                               |
|--------|-----------------------------------------------------|---------|---------|---------|---------|-------------------------------|
| Q8BH35 | Complement component C8 beta chain                  | 3.35570 | 0.76982 | 0.00350 | 0.39842 | DR; MP; RBP; RS               |
| Q8BWF0 | Succinate-semialdehyde dehydrogenase, mitochondrial | 2.88184 | 1.12867 | 0.01695 | 0.75927 | COB; MP                       |
| P50462 | Cysteine and glycine-rich protein 3                 | 0.18674 | 0.27397 | 0.00002 | 0.00723 | CDif; COB; CH; D; MP; RBP; RS |
| E9Q3E2 | Synaptopodin                                        | 0.22999 | 0.33841 | 0.00017 | 0.02093 | COB; RBP; RS                  |
| Q9QZ25 | Vascular non-inflammatory molecule 3                | 0.12265 | 0.23079 | 0.00000 | 0.00277 | MP                            |
| Q9WUZ5 | Troponin I, slow skeletal muscle                    | 0.34626 | 0.35236 | 0.00611 | 0.02525 | RBP                           |
| E9Q8K5 | Titin                                               | 0.20678 | 0.24219 | 0.00006 | 0.00367 | MP                            |
| O88346 | Troponin T, slow skeletal muscle                    | 0.46083 | 0.38610 | 0.04237 | 0.03807 | RBP                           |
| Q9JJW5 | Myozenin-2                                          | 0.12674 | 0.28785 | 0.00000 | 0.00938 | COB                           |
| P32848 | Parvalbumin alpha                                   | 0.13432 | 0.35613 | 0.00000 | 0.02652 | CH                            |
| Q9CRA2 | PDZ and LIM domain protein 5                        | 0.12344 | 0.24492 | 0.00000 | 0.00390 | CG; RBP                       |
| Q91YE8 | Synaptopodin-2                                      | 0.18839 | 0.25947 | 0.00002 | 0.00539 | COB; RBP                      |
| Q8BVJ7 | PDZ and LIM domain 7, isoform CRA_f                 | 0.14522 | 0.36914 | 0.00000 | 0.03124 | CDif; COB; D; RBP             |
| Q8C494 | Proline-rich protein 33                             | 0.22173 | 0.39952 | 0.00012 | 0.04410 |                               |
| F6X9B6 | Nebulin (Fragment)                                  | 0.12407 | 0.34831 | 0.00000 | 0.02395 | COB; RBP                      |
| Q8R4E4 | Myozenin-3                                          | 0.16231 | 0.36443 | 0.00000 | 0.02945 | COB                           |
| P04247 | Myoglobin                                           | 0.07568 | 0.18258 | 0.00000 | 0.00065 | CDif; RS; T                   |
| Q9JK37 | Myozenin-1                                          | 0.16088 | 0.38551 | 0.00000 | 0.03779 | COB                           |
| P11404 | Fatty acid-binding protein, heart                   | 0.09386 | 0.26781 | 0.00000 | 0.00641 | MP; RBP; RS; T                |
| O70250 | Phosphoglycerate mutase 2                           | 0.30921 | 0.31878 | 0.00249 | 0.01569 | MP; RBP; RS                   |
| P14152 | Malate dehydrogenase, cytoplasmic                   | 0.39277 | 0.32404 | 0.01520 | 0.01702 | MP                            |

|            |                                                                      |         |         |         |         |                                 |
|------------|----------------------------------------------------------------------|---------|---------|---------|---------|---------------------------------|
| Q9DC77     | Small muscular protein                                               | 0.39510 | 0.28952 | 0.01582 | 0.00967 |                                 |
| P16125     | L-lactate dehydrogenase B chain                                      | 0.43554 | 0.25233 | 0.02999 | 0.00462 | MP                              |
| P21550     | Beta-enolase                                                         | 0.41237 | 0.37481 | 0.02110 | 0.03339 | MP; RS                          |
| P16015     | Carbonic anhydrase 3                                                 | 0.15193 | 0.29214 | 0.00000 | 0.01013 | MP; RS                          |
| B2RQK7     | Synaptopodin 2-like protein                                          | 0.11338 | 0.25773 | 0.00000 | 0.00519 | RBP                             |
| O70400     | PDZ and LIM domain protein 1                                         | 0.24498 | 0.32321 | 0.00031 | 0.01680 | RBP; RS                         |
| Q99LX0     | Protein/nucleic acid deglycase DJ-1                                  | 0.26896 | 0.40552 | 0.00075 | 0.04697 | CC; COB; CP; DR; MP; RBP; RS; T |
| A2AEX8     | Four and a half LIM domains 1, isoform CRA_b                         | 0.38506 | 0.39510 | 0.01323 | 0.04203 | CDif; D; RBP                    |
| P62897     | Cytochrome c, somatic                                                | 0.43860 | 0.40420 | 0.03136 | 0.04634 | CDe; MP; RBP; T                 |
| P05201     | Aspartate aminotransferase, cytoplasmic                              | 0.46083 | 0.32884 | 0.04239 | 0.01825 | MP; RBP; RS                     |
| Q9R059     | Four and a half LIM domains protein 3                                | 0.30562 | 0.38700 | 0.00226 | 0.03843 | COB                             |
| F8WJ23     | Hornerin                                                             | 0.01000 | 0.01000 | 0.00000 | 0.00000 | CDif; D                         |
| Q9CQ91     | NADH dehydrogenase [ubiquinone] 1 alpha subcomplex subunit 3         | 0.43159 | 0.36711 | 0.02830 | 0.03043 | COB; MP; T                      |
| P48772     | Cytochrome c oxidase subunit 8B, mitochondrial                       | 0.33818 | 0.17756 | 0.00510 | 0.00054 | MP; RS; T                       |
| A0A0G2JFH2 | Microtubule-associated protein (Fragment)                            | 0.15521 | 0.35100 | 0.00000 | 0.02483 |                                 |
| Q05793     | Basement membrane-specific heparan sulfate proteoglycan core protein | 0.44843 | 0.39324 | 0.03595 | 0.04118 | CDif; COB; T                    |
| E9Q557     | Desmoplakin                                                          | 0.21612 | 0.22533 | 0.00010 | 0.00220 | CDif; COB; MP; RBP; RS          |
| P12242     | Mitochondrial brown fat uncoupling protein 1                         |         | 0.01000 |         | 0.00000 | CDif; RBP; RS; T                |
| P17183     | Gamma-enolase                                                        | 0.57904 | 0.38066 | 0.14434 | 0.03579 | MP                              |
| Q8BU85     | Methionine-R-sulfoxide reductase B3, mitochondrial                   | 0.48309 | 0.32787 | 0.05598 | 0.01798 | MP; RS                          |
| O08539     | Myc box-dependent-interacting protein 1                              | 0.25648 | 0.44033 | 0.00048 | 0.06581 | CDif; COB; D; RBP; T            |

|            |                                                                                |         |         |         |         |                           |
|------------|--------------------------------------------------------------------------------|---------|---------|---------|---------|---------------------------|
| Q924M7     | Mannose-6-phosphate isomerase                                                  | 0.36390 | 0.56657 | 0.00883 | 0.16434 | MP                        |
| O70548     | Telethonin                                                                     | 0.46318 | 0.54230 | 0.04370 | 0.14207 | COB; RS                   |
| Q3UGR5     | Haloacid dehalogenase-like hydrolase domain-containing protein 2               | 0.40650 | 0.53220 | 0.01915 | 0.13297 | MP                        |
| P70441     | Na(+)/H(+) exchange regulatory cofactor NHE-RF1                                | 0.25740 | 0.54289 | 0.00050 | 0.14252 | CDif; COB; CH; RBP; RS; T |
| D3Z7P3     | Glutaminase kidney isoform, mitochondrial                                      | 0.46147 | 0.44903 | 0.04279 | 0.07108 | CC; COB; MP; RBP; RS      |
| A0A1Y7VL34 | Dystrobrevin                                                                   | 0.46555 | 0.58514 | 0.04504 | 0.18256 |                           |
| O70571     | [Pyruvate dehydrogenase (acetyl-transferring)] kinase isozyme 4, mitochondrial | 0.43384 | 0.43422 | 0.02930 | 0.06221 | CC; MP; RBP; RS           |
| Q8R1G2     | Carboxymethylenebutenolidase homolog                                           | 0.33898 | 0.48544 | 0.00520 | 0.09578 | MP                        |
| Q9DAK9     | 14 kDa phosphohistidine phosphatase                                            | 0.25452 | 0.42391 | 0.00045 | 0.05639 | MP; RBP                   |
| E9PYJ9     | LIM domain-binding protein 3                                                   | 0.20794 | 0.48008 | 0.00006 | 0.09176 | COB                       |
| Q9ET78     | Junctophilin-2                                                                 | 0.24600 | 0.44228 | 0.00033 | 0.06694 | CH; D; RBP; T             |
| Q9D0F9     | Phosphoglucomutase-1                                                           | 0.38447 | 0.41982 | 0.01309 | 0.05424 | MP                        |
| E0CYV0     | Protein-L-isoaspartate O-methyltransferase                                     | 0.29446 | 0.52056 | 0.00166 | 0.12310 | MP; RBP                   |
| A0A0A6YVV8 | Muscleblind-like protein 1                                                     | 0.23878 | 0.44189 | 0.00024 | 0.06670 | CDif; COB; MP; RBP        |
| P70296     | Phosphatidylethanolamine-binding protein 1                                     | 0.22193 | 0.48828 | 0.00012 | 0.09772 | MP; RBP; RS               |
| Q9CPU0     | Lactoylglutathione lyase                                                       | 0.36350 | 0.53419 | 0.00876 | 0.13490 | CDif; MP; RBP             |
| Q8BH80     | Vesicle-associated membrane protein, associated protein B and C                | 0.41288 | 0.59880 | 0.02124 | 0.19632 | COB; CH; RBP; RS; T       |
| P09411     | Phosphoglycerate kinase 1                                                      | 0.40193 | 0.53619 | 0.01777 | 0.13647 | CDif; MP; RBP; RS         |
| Q920M5     | Coronin-6                                                                      | 0.14959 | 0.48286 | 0.00000 | 0.09389 | COB                       |
| P45591     | Cofilin-2                                                                      | 0.32362 | 0.46425 | 0.00360 | 0.08091 | COB; CH; RBP              |

|            |                                                                            |         |         |         |         |                       |
|------------|----------------------------------------------------------------------------|---------|---------|---------|---------|-----------------------|
| D3YZD8     | Mth938 domain-containing protein                                           | 0.19845 | 0.41754 | 0.00004 | 0.05306 | RBP                   |
| A0A1B0GSX6 | PDZ and LIM domain 3, isoform CRA_a                                        | 0.22707 | 0.46751 | 0.00015 | 0.08307 | COB                   |
| P70670     | Nascent polypeptide-associated complex subunit alpha, muscle-specific form | 0.22681 | 0.44504 | 0.00015 | 0.06861 | CCM; MP; RBP; T       |
| Q8CI70     | Leucine-rich repeat-containing protein 20                                  | 0.46041 | 0.58962 | 0.04216 | 0.18710 |                       |
| P61971     | Nuclear transport factor 2                                                 | 0.27270 | 0.58140 | 0.00085 | 0.17883 | COB; RBP; T           |
| K3W4S6     | Glycogenin                                                                 | 0.39277 | 0.52966 | 0.01519 | 0.13087 |                       |
| Q9JIF9     | Myotilin                                                                   | 0.44228 | 0.52219 | 0.03304 | 0.12446 |                       |
| P56375     | Acylphosphatase-2                                                          | 0.29507 | 0.49237 | 0.00168 | 0.10093 |                       |
| Q70IV5     | Synemin                                                                    | 0.36684 | 0.45351 | 0.00937 | 0.07382 | COB                   |
| P09470     | Angiotensin-converting enzyme                                              | 0.31066 | 0.43346 | 0.00259 | 0.06174 | CP; MP; RBP; RS; T    |
| Q64691     | Calpain-3                                                                  | 0.35791 | 0.49020 | 0.00783 | 0.09928 | CDe; COB; MP; RBP; RS |
| A0A0G2JEX1 | Nexilin                                                                    | 0.46795 | 0.42735 | 0.04642 | 0.05834 | RBP                   |
| Q62446     | Peptidyl-prolyl cis-trans isomerase FKBP3                                  | 0.21829 | 0.50327 | 0.00010 | 0.10913 | MP                    |
| Q8R2H9     | Phosphoethanolamine/phosphocholine phosphatase                             | 0.36657 | 0.52715 | 0.00932 | 0.12865 | MP; RBP               |
| Q9JJV2     | Profilin-2                                                                 | 0.40733 | 0.56883 | 0.01942 | 0.16667 | COB; RBP              |
| P68037     | Ubiquitin-conjugating enzyme E2 L3                                         | 0.31756 | 0.58173 | 0.00310 | 0.17923 | CP; MP; RBP; RS       |
| O88492     | Perilipin-4                                                                | 0.31797 | 0.47393 | 0.00313 | 0.08747 |                       |
| P17751     | Triosephosphate isomerase                                                  | 0.44170 | 0.42644 | 0.03275 | 0.05786 | D; MP                 |
| E9QQ96     | Obscurin                                                                   | 0.28645 | 0.43048 | 0.00131 | 0.06002 | CDif; D; MP; RBP      |
| E9PZF0     | Nucleoside diphosphate kinase                                              | 0.46425 | 0.59172 | 0.04439 | 0.18917 | MP; RBP               |
| Q791T5     | Mitochondrial carrier homolog 1                                            | 0.01000 | 0.48356 | 0.00000 | 0.09429 | CDe; MP; RBP; T       |

|        |                                                     |         |         |         |         |                     |
|--------|-----------------------------------------------------|---------|---------|---------|---------|---------------------|
| Q80UY1 | Carnosine N-methyltransferase                       | 0.43783 | 0.46232 | 0.03102 | 0.07959 | MP                  |
| S4R1W8 | Glyceraldehyde-3-phosphate dehydrogenase (Fragment) | 0.40783 | 0.45620 | 0.01962 | 0.07557 | MP                  |
| O35215 | D-dopachrome decarboxylase                          | 0.40096 | 0.56850 | 0.01747 | 0.16621 | MP; RBP             |
| Q9D967 | Magnesium-dependent phosphatase 1                   | 0.31656 | 0.56085 | 0.00302 | 0.15890 | MP                  |
| Q99MR9 | Protein phosphatase 1 regulatory subunit 3A         | 0.46970 | 0.49727 | 0.04755 | 0.10457 | MP                  |
| P61082 | NEDD8-conjugating enzyme Ubc12                      | 0.46992 | 0.53619 | 0.04759 | 0.13667 | MP; RBP             |
| Q8BZJ7 | DCN1-like protein 2                                 | 0.35920 | 0.57438 | 0.00803 | 0.17183 | MP; RBP             |
| P29595 | NEDD8                                               | 0.28498 | 0.53079 | 0.00125 | 0.13184 | MP; RBP; RS         |
| Q9DBB8 | Trans-1,2-dihydrobenzene-1,2-diol dehydrogenase     | 0.36996 | 0.58275 | 0.00997 | 0.18018 | MP                  |
| P59017 | Bcl-2-like protein 13                               | 0.29709 | 0.46019 | 0.00178 | 0.07824 | CDe; RBP            |
| P19246 | Neurofilament heavy polypeptide                     | 0.42626 | 0.41511 | 0.02614 | 0.05179 | COB; RBP; RS        |
| P10630 | Eukaryotic initiation factor 4A-II                  | 0.44072 | 0.54855 | 0.03230 | 0.14748 | MP; RBP             |
| Q6IFZ6 | Keratin, type II cytoskeletal 1b                    | 0.33944 | 0.57837 | 0.00524 | 0.17565 |                     |
| Q8CI12 | Smoothelin-like protein 2                           | 0.30760 | 0.56433 | 0.00239 | 0.16236 |                     |
| P47199 | Quinone oxidoreductase                              | 0.45620 | 0.53562 | 0.03995 | 0.13605 | COB; MP             |
| Q5DTJ9 | Myopalladin                                         | 0.43197 | 0.49652 | 0.02846 | 0.10393 | COB; RBP            |
| P24472 | Glutathione S-transferase A4                        | 0.45005 | 0.52138 | 0.04485 | 0.10559 | MP; RS              |
| Q9D1G1 | Ras-related protein Rab-1B                          | 0.43725 | 0.58377 | 0.03079 | 0.18118 | COB; MP; RBP; RS; T |
| Q9CQX8 | 28S ribosomal protein S36, mitochondrial            | 0.46838 | 0.43995 | 0.04676 | 0.06553 |                     |
| Q9WVQ5 | Methylthioribulose-1-phosphate dehydratase          | 0.47148 | 0.56689 | 0.04857 | 0.16470 | CDe; COB; MP; RBP   |
| Q8BLF1 | Neutral cholesterol ester hydrolase 1               | 0.01000 |         | 0.00000 |         | MP; RBP; RS         |



|        |                                                          |         |         |         |         |                            |
|--------|----------------------------------------------------------|---------|---------|---------|---------|----------------------------|
| Q02566 | Myosin-6                                                 | 0.68166 | 0.05444 | 0.29197 | 0.00000 | COB; CCM; MP; RBP; RS      |
| P15864 | Histone H1.2                                             | 0.83752 | 0.01000 | 0.58964 | 0.00000 | COB; MP; RBP               |
| Q9JHH6 | Carboxypeptidase B2                                      | 0.99701 | 0.30030 | 0.91619 | 0.01167 | CH; C; MP; RBP; RS         |
| P02463 | Collagen alpha-1(IV) chain                               | 0.62422 | 0.01000 | 0.20297 | 0.00000 | CDif; COB; RBP; RS         |
| Q3U741 | DEAD (Asp-Glu-Ala-Asp) box polypeptide 17, isoform CRA_a | 0.94429 | 0.11036 | 0.80883 | 0.00002 | CDif; COB; DR; MP; RBP; RS |
| O70310 | Glycylpeptide N-tetradecanoyltransferase 1               | 0.01000 | 1.45560 | 0.00000 | 0.89188 | MP                         |
| Q9JKB3 | Y-box-binding protein 3                                  | 0.24988 | 0.73099 | 0.00038 | 0.34941 | MP; RBP; RS                |
| P56380 | Bis(5'-nucleosyl)-tetrphosphatase [asymmetrical]         | 0.24149 | 0.67797 | 0.00027 | 0.28447 | CDe                        |
| Q9JK92 | Heat shock protein beta-8                                | 0.30788 | 0.83472 | 0.00240 | 0.48428 |                            |
| Q4VWZ5 | Acyl-CoA-binding protein                                 | 0.24278 | 0.88968 | 0.00029 | 0.55767 | CP; DR; MP; RBP; RS; T     |
| D3Z7Q5 | Programmed cell death protein 5                          | 0.34734 | 0.68634 | 0.00625 | 0.29434 | CDe; RBP; RS               |
| P70349 | Histidine triad nucleotide-binding protein 1             | 0.44883 | 0.71174 | 0.03617 | 0.32534 | CDe; MP; RBP; RS           |
| Q8R2G4 | Ecto-ADP-ribosyltransferase 3                            | 0.45620 | 0.78003 | 0.03997 | 0.41208 | MP                         |
| A2AE89 | Glutathione S-transferase Mu 1                           | 0.47237 | 0.68587 | 0.04913 | 0.29368 | MP; RS                     |
| Q9Z2Y3 | Homer protein homolog 1                                  | 0.42159 | 0.60790 | 0.02438 | 0.20583 | MP; RBP; RS                |
| O08911 | Mitogen-activated protein kinase 12                      | 0.45351 | 0.64935 | 0.03856 | 0.25136 | CDif; MP; RBP; RS          |
| P26043 | Radixin                                                  | 0.46339 | 0.68493 | 0.04386 | 0.29264 | COB; RBP; RS               |
| Q8C605 | ATP-dependent 6-phosphofructokinase                      | 0.20678 | 0.68493 | 0.00006 | 0.29272 | COB; MP                    |
| G5E8T9 | Hydroxyacyl glutathione hydrolase                        | 0.41754 | 0.61690 | 0.02286 | 0.21562 | MP                         |
| P54923 | [Protein ADP-ribosylarginine] hydrolase                  | 0.36536 | 0.85179 | 0.00910 | 0.50701 | MP; RBP; T                 |
| Q9CQH7 | Transcription factor BTF3 homolog 4                      | 0.39494 | 0.93809 | 0.01577 | 0.62296 |                            |

|            |                                                        |         |         |         |         |                                        |
|------------|--------------------------------------------------------|---------|---------|---------|---------|----------------------------------------|
| Q9CZ44     | NSFL1 cofactor p47                                     | 0.38183 | 0.76336 | 0.01247 | 0.38999 | COB; MP; RBP                           |
| Q9JMG1     | Endothelial differentiation-related factor 1           | 0.37133 | 0.80451 | 0.01024 | 0.44407 | CDif; D; MP; RBP                       |
| Q9D1X0     | Nucleolar protein 3                                    | 0.43611 | 0.65703 | 0.03022 | 0.26018 | CDe; CDif; COB; CP; CH; MP; RBP; RS; T |
| P54726     | UV excision repair protein RAD23 homolog A             | 0.46404 | 0.68729 | 0.04418 | 0.29553 | MP; RBP; RS                            |
| Q8BVI4     | Dihydropteridine reductase                             | 0.42790 | 0.60569 | 0.02678 | 0.20341 | MP; RS                                 |
| Q8BFS6     | Serine/threonine-protein phosphatase CPPED1            | 0.37355 | 0.72939 | 0.01070 | 0.34688 | MP                                     |
| Q66JS6     | Eukaryotic translation initiation factor 3 subunit J-B | 0.26991 | 0.87260 | 0.00077 | 0.53481 | MP                                     |
| Q9JKB1     | Ubiquitin carboxyl-terminal hydrolase isozyme L3       | 0.39984 | 0.81103 | 0.01717 | 0.45261 | MP; RBP; RS                            |
| Q91VH6     | Protein MEMO1                                          | 0.47148 | 0.91491 | 0.04856 | 0.59196 | RBP                                    |
| P48025     | Tyrosine-protein kinase SYK                            | 0.34106 | 0.62735 | 0.00543 | 0.22690 | CCM; DR; MP; RBP; RS; T                |
| A0A140T8P5 | Immunoglobulin kappa chain variable 8-24 (Fragment)    | 0.01000 | 1.09170 | 0.00000 | 0.76184 |                                        |
| P06800     | Receptor-type tyrosine-protein phosphatase C           | 0.40700 | 0.75700 | 0.01934 | 0.38237 |                                        |
| P56695     | Wolframin                                              | 0.01000 | 1.11235 | 0.00000 | 0.74861 | CH; MP; RBP; RS                        |
| Q64152     | Transcription factor BTF3                              | 0.43840 | 1.48810 | 0.03129 | 0.73998 | MP; RBP; T                             |
| Q9CY58     | Plasminogen activator inhibitor 1 RNA-binding protein  | 0.39872 | 0.91827 | 0.01685 | 0.59646 | RBP                                    |
| P63028     | Translationally-controlled tumor protein               | 0.35298 | 1.19474 | 0.00705 | 0.95205 | CDif; RBP                              |
| G3X8T7     | Sodium channel protein                                 | 0.32289 | 0.91659 | 0.00355 | 0.59441 | RBP; T                                 |
| Q8BHG2     | UPF0587 protein C1orf123 homolog                       | 0.35549 | 0.82576 | 0.00745 | 0.47219 |                                        |
| Q8BGD9     | Eukaryotic translation initiation factor 4B            | 0.38715 | 0.97847 | 0.01375 | 0.67650 | COB; MP                                |
| P60670     | Nuclear protein localization protein 4 homolog         | 0.35423 | 1.10742 | 0.00872 | 0.75413 | COB; MP; RBP; T                        |

|        |                                |         |         |         |         |                  |
|--------|--------------------------------|---------|---------|---------|---------|------------------|
| Q60737 | Casein kinase II subunit alpha | 0.46620 | 0.81633 | 0.04542 | 0.45958 | CDe; MP; RBP; RS |
| P35385 | Heat shock protein beta-7      | 0.34771 | 0.86806 | 0.00630 | 0.52846 | RS               |

---

**Supplementary Table 2. Quantitative comparison of proteins differentially expressed after CACs treatment on days 2 and 4 (SE vs SC).** The table includes (from left to right) Uniprot accession number, protein description, abundance ratio on days 2 and 4 (considering **up-regulated** ratio>1.5 and **down-regulated** ratio<0.6), P-value at days 2 and 4 (considering P-value<0.05 as **differentially significant**) and biological processes in which proteins are involved: Response to stimulus (RS), cell organization and biogenesis (COB), metabolic process (MP), regulation of biological process (RBP), transport (T), cell differentiation (CDif), cell death (CDe), cellular homeostasis (CH), coagulation (C), defense response (DR), cellular component movement (CCM), development (D), cell proliferation (CP), cell communication (CC), cell growth (CG) and cell division (CDiv).

| Accession | Description                                                                       | Abundance ratio |           | P-value |         | Biological Process |
|-----------|-----------------------------------------------------------------------------------|-----------------|-----------|---------|---------|--------------------|
|           |                                                                                   | SE2/SC2         | SE4/SC4   | SE2/SC2 | SE4/SC4 |                    |
| P02463    | Collagen alpha-1(IV) chain                                                        | 2.42300         | 100.00000 | 0.00001 | 0.00000 | CDif; COB; RBP; RS |
| Q9Z331    | Keratin, type II cytoskeletal 6B                                                  | 4.24500         | 100.00000 | 0.00000 | 0.00000 | COB; MP            |
| P02535    | Keratin, type I cytoskeletal 10                                                   | 1.58000         | 2.31500   | 0.00148 | 0.00002 | CDif; COB; RS      |
| Q2VIS4    | Filaggrin-2                                                                       | 100.00000       | 100.00000 | 0.00000 | 0.00000 |                    |
| P17183    | Gamma-enolase                                                                     | 1.85000         | 1.59100   | 0.00000 | 0.02215 | MP                 |
| F8WJ23    | Hornerin                                                                          | 100.00000       | 100.00000 | 0.00000 | 0.00000 | CDif; D            |
| O70571    | [Pyruvate dehydrogenase (acetyl-transferring)]<br>kinase isozyme 4, mitochondrial | 1.66000         | 1.59900   | 0.00015 | 0.01559 | CC; MP; RBP; RS    |
| Q9CR86    | Calcium-regulated heat stable protein 1                                           | 1.67700         | 1.74800   | 0.00934 | 0.03458 | RBP                |
| Q62059    | Versican core protein                                                             | 1.62600         | 1.59600   | 0.00821 | 0.03985 | CDif; CCM; RBP     |
| Q9R0H5    | Keratin, type II cytoskeletal 71                                                  | 2.42800         | 2.61200   | 0.00055 | 0.00478 | COB; MP            |
| E9QK82    | Myelin protein P0                                                                 | 0.56300         | 1.71200   | 0.00000 | 0.00350 | COB; RBP           |
| P00848    | ATP synthase subunit a                                                            | 0.01000         |           | 0.00000 |         | MP; RS; T          |
| Q9QWL7    | Keratin, type I cytoskeletal 17                                                   | 0.67700         | 1.60100   | 0.00489 | 0.01688 | COB; RBP; RS       |
| P15327    | Bisphosphoglycerate mutase                                                        | 1.37100         | 1.72800   | 0.02502 | 0.02100 | MP; RBP            |
| P14069    | Protein S100-A6                                                                   | 0.69400         | 1.76500   | 0.00188 | 0.00198 | T                  |
| Q8BWM3    | MCG130173                                                                         | 0.75400         | 1.91000   | 0.04755 | 0.00056 | RBP                |

|        |                                                             |         |           |         |         |                                    |
|--------|-------------------------------------------------------------|---------|-----------|---------|---------|------------------------------------|
| O89020 | Afamin                                                      | 0.78100 | 1.65900   | 0.04752 | 0.01017 | T                                  |
| P50543 | Protein S100-A11                                            | 0.73300 | 1.59500   | 0.01829 | 0.01169 | RBP                                |
| P07724 | Serum albumin                                               | 0.75300 | 1.74500   | 0.01593 | 0.00246 | CC; RBP; RS; T                     |
| P04919 | Band 3 anion transport protein                              | 1.27900 | 1.76100   | 0.03773 | 0.00208 | COB; CH; RBP; RS; T                |
| O70456 | 14-3-3 protein sigma                                        | 0.66400 | 4.51100   | 0.00275 | 0.00000 | CDif; COB; RBP; RS                 |
| Q06770 | Corticosteroid-binding globulin                             | 0.69300 | 1.75100   | 0.00281 | 0.00418 | MP; RBP; T                         |
| Q8VCT4 | Carboxylesterase 1D                                         | 0.65300 | 1.54800   | 0.00030 | 0.01823 | CDif; COB; MP; RS                  |
| F6RT34 | Myelin basic protein (Fragment)                             | 0.61100 | 1.57400   | 0.00003 | 0.01423 | COB; RS                            |
| P70124 | Serpin B5                                                   | 0.90300 | 1.79900   | 0.70771 | 0.04013 | COB; RBP                           |
| P50446 | Keratin, type II cytoskeletal 6A                            | 1.00400 | 3.13400   | 0.93924 | 0.00002 | COB; DR; MP; RBP; RS               |
| P05367 | Serum amyloid A-2 protein                                   | 0.77500 | 2.00600   | 0.05508 | 0.02623 | CCM; DR; RS                        |
| P61759 | Prefoldin subunit 3                                         | 1.24000 | 1.94900   | 0.24388 | 0.01464 | COB; MP                            |
| P30355 | Arachidonate 5-lipoxygenase-activating protein              | 0.83300 | 1.94900   | 0.23455 | 0.00244 | COB; MP; RBP; RS                   |
| Q9Z2A7 | Diacylglycerol O-acyltransferase 1                          | 0.86500 | 2.71700   | 0.64342 | 0.00460 | COB; MP; RBP; T                    |
| P12242 | Mitochondrial brown fat uncoupling protein 1                | 0.72100 | 100.00000 | 0.09335 | 0.00000 | CDif; RBP; RS; T                   |
| Q91X72 | Hemopexin                                                   | 1.16200 | 1.70500   | 0.20733 | 0.00375 | CH; MP; RBP; T                     |
| P06728 | Apolipoprotein A-IV                                         | 0.80200 | 1.50400   | 0.05991 | 0.02795 | COB; DR; MP; RBP; RS; T            |
| Q9JM83 | Calmodulin-4                                                | 0.94000 | 8.30500   | 0.77464 | 0.00000 | RBP; RS                            |
| Q6S9I0 | Kininogen 2                                                 | 1.35200 | 1.85700   | 0.18950 | 0.02469 | CH; RBP                            |
| P20491 | High affinity immunoglobulin epsilon receptor subunit gamma | 1.16800 | 2.06700   | 0.47388 | 0.00430 | CDif; COB; CCM; DR; MP; RBP; RS; T |
| Q497J0 | MCG130175, isoform CRA_b                                    | 0.99400 | 3.80600   | 0.84093 | 0.00000 | RBP                                |

|            |                                                                   |         |         |         |         |                         |
|------------|-------------------------------------------------------------------|---------|---------|---------|---------|-------------------------|
| Q9DCM0     | Persulfide dioxygenase ETHE1, mitochondrial                       | 1.30400 | 2.81700 | 0.19691 | 0.00040 | MP                      |
| B2RV77     | MCG130182, isoform CRA_a                                          | 1.19400 | 2.32300 | 0.27351 | 0.00001 | RBP                     |
| Q3UP87     | Neutrophil elastase                                               | 0.94700 | 1.57500 | 0.61237 | 0.02421 | CCM; DR; MP; RBP; RS; T |
| Q80SZ7     | Guanine nucleotide-binding protein G(I)/G(S)/G(O) subunit gamma-5 | 0.96900 | 1.74800 | 0.77747 | 0.02401 | RBP; RS                 |
| Q8BND5     | Sulfhydryl oxidase 1                                              | 0.89700 | 1.51700 | 0.33875 | 0.03474 | CH; MP; RBP             |
| Q9QXC1     | Fetuin-B                                                          | 0.93900 | 1.51600 | 0.53847 | 0.03263 | RBP                     |
| P59999     | Actin-related protein 2/3 complex subunit 4                       | 0.84100 | 1.64300 | 0.15613 | 0.01027 | COB; RBP                |
| G3X8Q5     | Ceruloplasmin                                                     | 0.99300 | 1.52900 | 0.94752 | 0.02198 | CH; MP; RS; T           |
| Q91XL1     | Leucine-rich HEV glycoprotein                                     | 0.92600 | 2.37500 | 0.48944 | 0.00000 | CDif; RBP               |
| P29699     | Alpha-2-HS-glycoprotein                                           | 1.12200 | 1.51400 | 0.33333 | 0.02546 | COB; DR; RBP; RS        |
| O35744     | Chitinase-like protein 3                                          | 1.05000 | 1.79800 | 0.68664 | 0.00140 | DR; MP; RS              |
| Q91VW3     | SH3 domain-binding glutamic acid-rich-like protein 3              | 0.84900 | 1.57200 | 0.15620 | 0.01595 | CH; MP; RBP             |
| P14847     | C-reactive protein                                                | 0.99600 | 1.85900 | 0.90981 | 0.01567 | COB; DR; MP; RBP; RS    |
| P01867     | Ig gamma-2B chain C region                                        | 0.90900 | 1.67800 | 0.53429 | 0.03820 | COB; DR; MP; RBP; RS    |
| P02088     | Hemoglobin subunit beta-1                                         | 0.92600 | 1.81500 | 0.51257 | 0.00117 | RBP; T                  |
| P02089     | Hemoglobin subunit beta-2                                         | 0.95200 | 1.76300 | 0.66878 | 0.00203 | RBP; RS; T              |
| P01942     | Hemoglobin subunit alpha                                          | 1.09000 | 2.13100 | 0.46999 | 0.00003 | RS; T                   |
| AOA0A6YW77 | Neutrophil gelatinase-associated lipocalin (Fragment)             | 0.93200 | 1.76800 | 0.54835 | 0.00148 | DR; RBP; RS; T          |
| Q8R2S8     | CD177 antigen                                                     | 1.06800 | 2.05800 | 0.74658 | 0.00012 | COB; CCM; RBP           |
| P43883     | Perilipin-2                                                       | 1.04900 | 1.63600 | 0.78890 | 0.01142 | RS; T                   |
| A2APM2     | CD44 antigen                                                      | 1.10000 | 1.70600 | 0.60382 | 0.00532 | COB; CCM; MP; RBP; RS   |

|            |                                              |         |         |         |         |                             |
|------------|----------------------------------------------|---------|---------|---------|---------|-----------------------------|
| P00920     | Carbonic anhydrase 2                         | 1.13600 | 1.80800 | 0.28447 | 0.00126 | CH; MP; RBP; RS; T          |
| O88545     | COP9 signalosome complex subunit 6           | 1.02100 | 1.78200 | 0.98301 | 0.00187 | MP                          |
| Q9CRB1     | Galectin                                     | 1.05600 | 6.45100 | 0.82782 | 0.00000 | CDe                         |
| P13634     | Carbonic anhydrase 1                         | 0.92000 | 1.98200 | 0.47091 | 0.00029 | MP                          |
| P83870     | PHD finger-like domain-containing protein 5A | 1.21300 | 1.55200 | 0.10361 | 0.01753 | MP; RBP                     |
| P28293     | Cathepsin G                                  | 0.99000 | 1.69400 | 0.84080 | 0.00575 | DR; MP; RBP; RS             |
| A0A0R4IZY6 | Myeloblastin                                 | 0.79700 | 2.62900 | 0.11427 | 0.00007 | CDif; COB; CCM; MP; RBP; T  |
| P17047     | Lysosome-associated membrane glycoprotein 2  | 0.85000 | 1.57400 | 0.23247 | 0.02114 | CC; COB; CH; MP; RBP; RS; T |
| Q6ZWY8     | Thymosin beta-10                             | 0.62800 | 2.39200 | 0.05767 | 0.00040 | COB                         |
| P03975     | IgE-binding protein                          | 1.16100 | 2.27100 | 0.42704 | 0.00113 | MP                          |
| P49138     | MAP kinase-activated protein kinase 2        | 1.29900 | 1.68800 | 0.14092 | 0.03600 | DR; MP; RBP; RS; T          |
| P07091     | Protein S100-A4                              | 1.07000 | 1.74100 | 0.73219 | 0.00257 | RBP                         |
| O09159     | Lysosomal alpha-mannosidase                  | 0.70000 | 2.03200 | 0.20615 | 0.03822 | MP; RS                      |
| E9Q557     | Desmoplakin                                  | 1.05600 | 5.11000 | 0.74778 | 0.00000 | CDif; COB; MP; RBP; RS      |
| Q02257     | Junction plakoglobin                         | 1.29700 | 2.57700 | 0.27079 | 0.00642 | COB; CCM; RBP; RS           |
| Q05816     | Fatty acid-binding protein, epidermal        | 1.15400 | 1.52300 | 0.35741 | 0.03036 | MP; T                       |
| P24549     | Retinal dehydrogenase 1                      | 0.96700 | 1.57800 | 0.71373 | 0.02033 | COB; MP; RBP; RS            |
| Q8C7X2     | ER membrane protein complex subunit 1        | 0.83200 | 1.53200 | 0.16873 | 0.03039 | MP                          |
| P60122     | RuvB-like 1                                  | 1.03500 | 1.61200 | 0.92025 | 0.03308 | CDiv; COB; MP; RBP; RS      |
| P30416     | Peptidyl-prolyl cis-trans isomerase FKBP4    | 0.92300 | 1.60500 | 0.50349 | 0.02656 | COB; MP; RBP; RS; T         |
| P51863     | V-type proton ATPase subunit d 1             | 0.96700 | 1.70600 | 0.78710 | 0.01788 | COB; CH; RS; T              |
| P97300     | Neuroplastin                                 | 0.85700 | 1.61300 | 0.25350 | 0.01924 | COB; CH; RBP; RS            |



|            |                                                                     |           |         |         |         |                               |
|------------|---------------------------------------------------------------------|-----------|---------|---------|---------|-------------------------------|
| Q8R1V4     | Transmembrane emp24 domain-containing protein 4                     | 0.88400   | 1.77700 | 0.41669 | 0.03410 | RBP; RS; T                    |
| A0A0N4SW28 | Guanine nucleotide-binding protein subunit gamma                    | 1.01300   | 1.89100 | 0.96585 | 0.01187 | RBP; RS                       |
| P01831     | Thy-1 membrane glycoprotein                                         | 1.04000   | 1.88900 | 0.90517 | 0.00356 | CC; COB; MP; RBP; RS          |
| Q9QZ25     | Vascular non-inflammatory molecule 3                                | 3.60100   | 0.26100 | 0.00000 | 0.00001 | MP                            |
| A0A140T8P5 | Immunoglobulin kappa chain variable 8-24 (Fragment)                 | 100.00000 | 0.01000 | 0.00000 | 0.00000 |                               |
| P51667     | Myosin regulatory light chain 2, ventricular/cardiac muscle isoform | 1.58900   | 0.53000 | 0.00009 | 0.00029 | COB; RBP                      |
| G3X8T7     | Sodium channel protein                                              | 3.32400   | 0.01000 | 0.00000 | 0.00000 | RBP; T                        |
| P32848     | Parvalbumin alpha                                                   | 1.95100   | 0.36900 | 0.00000 | 0.00000 | CH                            |
| Q9CRA2     | PDZ and LIM domain protein 5                                        | 1.80600   | 0.35700 | 0.00000 | 0.00000 | CG; RBP                       |
| Q8BVJ7     | PDZ and LIM domain 7, isoform CRA_f                                 | 1.67500   | 0.42200 | 0.00001 | 0.00000 | CDif; COB; D; RBP             |
| Q8VC88     | Grancalcin                                                          | 100.00000 | 0.53000 | 0.00000 | 0.02241 | MP                            |
| Q91Z83     | Myosin-7                                                            | 1.74600   | 0.58900 | 0.00000 | 0.00238 | COB; CCM; MP; RBP; RS         |
| Q9JJW5     | Myozenin-2                                                          | 1.92200   | 0.32800 | 0.00000 | 0.00000 | COB                           |
| P56695     | Wolframin                                                           | 100.00000 | 0.01000 | 0.00000 | 0.00000 | CH; MP; RBP; RS               |
| P50462     | Cysteine and glycine-rich protein 3                                 | 1.71800   | 0.54800 | 0.00028 | 0.00698 | CDif; COB; CH; D; MP; RBP; RS |
| A0A0A6YWR2 | Ig gamma-1 chain C region secreted form (Fragment)                  | 2.98300   | 0.53400 | 0.00000 | 0.00055 |                               |
| O88346     | Troponin T, slow skeletal muscle                                    | 1.66800   | 0.38200 | 0.00002 | 0.00000 | RBP                           |
| Q791T5     | Mitochondrial carrier homolog 1                                     | 100.00000 | 0.01000 | 0.00000 | 0.00000 | CDe; MP; RBP; T               |
| Q9CQX2     | Cytochrome b5 type B                                                | 1.81500   | 0.34200 | 0.00358 | 0.00025 | MP; RBP; T                    |
| P09542     | Myosin light chain 3                                                | 1.90100   | 0.49800 | 0.00000 | 0.00007 | RBP                           |

|            |                                            |         |         |         |         |                        |
|------------|--------------------------------------------|---------|---------|---------|---------|------------------------|
| P04247     | Myoglobin                                  | 1.90500 | 0.26100 | 0.00000 | 0.00000 | CDif; RS; T            |
| Q9JK37     | Myozenin-1                                 | 1.50900 | 0.31600 | 0.00051 | 0.00000 | COB                    |
| P11404     | Fatty acid-binding protein, heart          | 1.61000 | 0.52800 | 0.00006 | 0.00027 | MP; RBP; RS; T         |
| B2RQK7     | Synaptopodin 2-like protein                | 1.73000 | 0.42900 | 0.00013 | 0.00000 | RBP                    |
| A0A0A6YVV8 | Muscleblind-like protein 1                 | 3.54000 | 0.58300 | 0.00000 | 0.01504 | CDif; COB; MP; RBP     |
| Q920M5     | Coronin-6                                  | 2.45400 | 0.51500 | 0.00003 | 0.01150 | COB                    |
| Q4VWZ5     | Acyl-CoA-binding protein                   | 1.75300 | 0.48400 | 0.00002 | 0.00002 | CP; DR; MP; RBP; RS; T |
| Q62446     | Peptidyl-prolyl cis-trans isomerase FKBP3  | 1.61300 | 0.51500 | 0.00121 | 0.00015 | MP                     |
| Q9R059     | Four and a half LIM domains protein 3      | 1.54600 | 0.59900 | 0.00359 | 0.00518 | COB                    |
| P59017     | Bcl-2-like protein 13                      | 1.67700 | 0.01000 | 0.03834 | 0.00000 | CDe; RBP               |
| P35385     | Heat shock protein beta-7                  | 1.57100 | 0.31400 | 0.00140 | 0.00000 | RS                     |
| B1AQ77     | Keratin 15, isoform CRA_a                  | 1.54900 | 0.27500 | 0.04676 | 0.00000 |                        |
| Q9WV06     | Ankyrin repeat domain-containing protein 2 | 1.75900 | 0.50700 | 0.00000 | 0.00009 | CDif; RBP; RS          |
| Q9ES74     | Serine/threonine-protein kinase Nek7       | 3.82200 | 0.44300 | 0.00000 | 0.00228 | MP; RBP                |
| Q60866     | Phosphotriesterase-related protein         | 1.52200 | 0.32300 | 0.08111 | 0.00049 | CDif; MP               |
| O35969     | Guanidinoacetate N-methyltransferase       |         | 0.52200 |         | 0.04585 | MP; RBP                |
| Q3TTY5     | Keratin, type II cytoskeletal 2 epidermal  | 2.63300 | 0.65000 | 0.00000 | 0.01705 | COB; CP; CCM; MP       |
| P28653     | Biglycan                                   | 1.64200 | 0.69000 | 0.00004 | 0.02111 | MP; RBP; RS            |
| Q9WUZ5     | Troponin I, slow skeletal muscle           | 1.83800 | 0.62300 | 0.00000 | 0.00422 | RBP                    |
| P63028     | Translationally-controlled tumor protein   | 1.53800 | 0.67300 | 0.00181 | 0.01388 | CDif; RBP              |
| Q9JK92     | Heat shock protein beta-8                  | 1.83100 | 0.66000 | 0.00018 | 0.02270 |                        |
| P68037     | Ubiquitin-conjugating enzyme E2 L3         | 1.60900 | 0.63100 | 0.00159 | 0.00756 | CP; MP; RBP; RS        |

|            |                                                        |           |         |         |         |                         |
|------------|--------------------------------------------------------|-----------|---------|---------|---------|-------------------------|
| Q6P5H2     | Nestin                                                 | 2.07600   | 0.77700 | 0.00421 | 0.30196 | COB; CP; D; RBP         |
| Q8BJY1     | 26S proteasome non-ATPase regulatory subunit 5         | 100.00000 | 1.39200 | 0.00000 | 0.46883 | COB                     |
| A0A0B4J1H7 | Immunoglobulin kappa variable 1-135 (Fragment)         | 2.02200   | 0.87600 | 0.00101 | 0.54135 | RS                      |
| O70310     | Glycylpeptide N-tetradecanoyltransferase 1             | 100.00000 | 0.68500 | 0.00000 | 0.22778 | MP                      |
| Q6PFA2     | Clathrin light chain                                   | 2.03100   | 0.92700 | 0.00115 | 0.60151 | CDiv; COB; T            |
| P61082     | NEDD8-conjugating enzyme Ubc12                         | 1.80900   | 0.97600 | 0.00007 | 0.76849 | MP; RBP                 |
| O88492     | Perilipin-4                                            | 1.50800   | 0.79000 | 0.00104 | 0.12686 |                         |
| P62983     | Ubiquitin-40S ribosomal protein S27a                   | 1.64200   | 0.74400 | 0.00003 | 0.08437 | MP                      |
| D3YYD0     | Olfactomedin-4                                         | 2.75500   | 0.73200 | 0.00000 | 0.17490 | COB; RBP                |
| Q64691     | Calpain-3                                              | 1.72000   | 0.76700 | 0.02519 | 0.38754 | CDe; COB; MP; RBP; RS   |
| Q66JS6     | Eukaryotic translation initiation factor 3 subunit J-B | 1.73000   | 0.69000 | 0.02636 | 0.14259 | MP                      |
| E9Q3E2     | Synaptopodin                                           | 2.10000   | 1.09600 | 0.00000 | 0.84477 | COB; RBP; RS            |
| Q00897     | Alpha-1-antitrypsin 1-4                                | 2.04000   | 1.02500 | 0.00000 | 0.96924 | RBP; RS                 |
| P01865     | Ig gamma-2A chain C region, membrane-bound form        | 9.85600   | 0.98100 | 0.00000 | 0.81596 | COB; DR; MP; RBP; RS; T |
| Q62148     | Retinal dehydrogenase 2                                | 2.04600   | 1.28100 | 0.00619 | 0.59381 | CDif; MP; RBP; RS       |
| A0A1Y7VL34 | Dystrobrevin                                           | 1.61200   | 1.21700 | 0.01957 | 0.54620 |                         |
| A0A0G2JEK2 | Cysteine-rich protein 1                                | 1.89300   | 1.23700 | 0.00010 | 0.39243 | RBP; RS                 |
| P04104     | Keratin, type II cytoskeletal 1                        | 1.92000   | 0.98400 | 0.00000 | 0.83229 | DR; MP; RBP; RS         |
| Q8CI43     | Myosin light chain 6B                                  | 1.51400   | 0.71500 | 0.00045 | 0.05083 | CCM                     |
| Q8BLF1     | Neutral cholesterol ester hydrolase 1                  | 100.00000 | 1.17300 | 0.00000 | 0.78584 | MP; RBP; RS             |

|        |                                                                      |         |         |         |         |                         |
|--------|----------------------------------------------------------------------|---------|---------|---------|---------|-------------------------|
| P01837 | Immunoglobulin kappa constant                                        | 2.03200 | 0.86000 | 0.00000 | 0.35700 |                         |
| Q91Y97 | Fructose-bisphosphate aldolase B                                     | 2.19200 | 0.83200 | 0.00001 | 0.38780 | COB; MP; RBP; RS        |
| O35114 | Lysosome membrane protein 2                                          | 1.69200 | 1.13000 | 0.02692 | 0.76660 | RBP; T                  |
| Q6IFZ6 | Keratin, type II cytoskeletal 1b                                     | 1.86800 | 0.89300 | 0.00000 | 0.40415 |                         |
| Q05BC3 | Echinoderm microtubule-associated protein-like 1                     | 1.54800 | 0.85200 | 0.01685 | 0.44887 | CDif; COB; CP           |
| O89079 | Coatomer subunit epsilon                                             | 1.80000 | 0.70200 | 0.00181 | 0.16979 | T                       |
| Q9D4H8 | Cullin-2                                                             | 2.28300 | 0.93200 | 0.00002 | 0.61981 | MP                      |
| Q05793 | Basement membrane-specific heparan sulfate proteoglycan core protein | 1.52100 | 0.98200 | 0.00532 | 0.81884 | CDif; COB; T            |
| P16045 | Galectin-1                                                           | 1.55300 | 1.11800 | 0.00020 | 0.58839 | CDe; CDif; CH; RBP; RS  |
| Q91VH6 | Protein MEMO1                                                        | 1.59100 | 1.11700 | 0.03420 | 0.78602 | RBP                     |
| P08074 | Carbonyl reductase [NADPH] 2                                         | 1.94900 | 0.94900 | 0.00001 | 0.67116 | COB; MP                 |
| Q9DBG5 | Perilipin-3                                                          | 1.61400 | 1.15300 | 0.00681 | 0.62872 | T                       |
| Q80XN0 | D-beta-hydroxybutyrate dehydrogenase, mitochondrial                  | 1.56500 | 0.91600 | 0.01066 | 0.60033 | MP                      |
| D3YUE2 | Procollagen C-endopeptidase enhancer 1                               | 1.62400 | 0.93400 | 0.01427 | 0.65923 | MP; RBP                 |
| Q9DCS3 | Enoyl-[acyl-carrier-protein] reductase, mitochondrial                | 1.78300 | 0.94900 | 0.00808 | 0.74459 | MP                      |
| Q9CQW1 | Synaptobrevin homolog YKT6                                           | 2.04700 | 1.49400 | 0.00235 | 0.17721 | COB; T                  |
| Q02566 | Myosin-6                                                             | 0.55300 | 0.01000 | 0.00560 | 0.00000 | COB; CCM; MP; RBP; RS   |
| P48772 | Cytochrome c oxidase subunit 8B, mitochondrial                       | 0.59700 | 0.01000 | 0.00080 | 0.00000 | MP; RS; T               |
| Q9Z1F9 | SUMO-activating enzyme subunit 2                                     | 0.46300 | 0.32300 | 0.00018 | 0.00076 | MP                      |
| A2CELO | Major urinary protein 1                                              | 0.51400 | 0.01000 | 0.00665 | 0.00000 | CC; COB; MP; RBP; RS; T |

|            |                                                |         |         |         |         |                               |
|------------|------------------------------------------------|---------|---------|---------|---------|-------------------------------|
| P29595     | NEDD8                                          | 0.38300 | 0.22700 | 0.00000 | 0.00001 | MP; RBP; RS                   |
| E9PYB0     | AHNAK nucleoprotein 2 (Fragment)               | 0.41100 | 0.37500 | 0.00000 | 0.00003 | COB                           |
| Q9QYB1     | Chloride intracellular channel protein 4       | 0.33200 | 0.01000 | 0.00000 | 0.00000 | CDif; COB; CH; MP; RBP; RS; T |
| Q91YE8     | Synaptopodin-2                                 | 1.32200 | 0.46500 | 0.01787 | 0.00001 | COB; RBP                      |
| P11087     | Collagen alpha-1(I) chain                      | 1.34400 | 0.56100 | 0.01244 | 0.00094 | CC; CDif; COB; MP; RBP; RS; T |
| O08539     | Myc box-dependent-interacting protein 1        | 1.49600 | 0.57100 | 0.00066 | 0.00134 | CDif; COB; D; RBP; T          |
| E9Q8K5     | Titin                                          | 1.39100 | 0.39000 | 0.01631 | 0.00000 | MP                            |
| O70250     | Phosphoglycerate mutase 2                      | 1.48800 | 0.54700 | 0.00078 | 0.00056 | MP; RBP; RS                   |
| P16015     | Carbonic anhydrase 3                           | 1.42200 | 0.56100 | 0.00293 | 0.00095 | MP; RS                        |
| E9PYJ9     | LIM domain-binding protein 3                   | 1.34900 | 0.58500 | 0.01153 | 0.00213 | COB                           |
| P70296     | Phosphatidylethanolamine-binding protein 1     | 1.49700 | 0.57800 | 0.00065 | 0.00168 | MP; RBP; RS                   |
| P63024     | Vesicle-associated membrane protein 3          | 0.60700 | 0.57400 | 0.01300 | 0.03179 | COB; RBP; T                   |
| A0A0R4J0F8 | Cartilage intermediate layer protein 1         | 0.61000 | 0.50400 | 0.02194 | 0.02866 | RBP                           |
| Q80Z68     | Rho GTPase activating protein 4, isoform CRA_f | 0.71000 | 0.01000 | 0.34644 | 0.00000 | RBP; RS                       |
| D3Z7H8     | Cartilage intermediate layer protein 2         | 1.13800 | 0.53200 | 0.38318 | 0.00256 |                               |
| P09528     | Ferritin heavy chain                           | 1.03500 | 0.55000 | 0.78653 | 0.00065 | CH; MP; RBP; RS; T            |
| P15864     | Histone H1.2                                   | 0.85500 | 0.52500 | 0.29985 | 0.03027 | COB; MP; RBP                  |
| Q8C494     | Proline-rich protein 33                        | 1.04100 | 0.45400 | 0.89784 | 0.00042 |                               |
| F6X9B6     | Nebulin (Fragment)                             | 1.18500 | 0.52600 | 0.30225 | 0.00098 | COB; RBP                      |
| Q8R4E4     | Myozenin-3                                     | 1.30600 | 0.31600 | 0.06978 | 0.00000 | COB                           |
| O54824     | Pro-interleukin-16                             | 1.15700 | 0.49700 | 0.49304 | 0.00538 | CCM; MP; RBP; RS              |
| Q9WUK2     | Eukaryotic translation initiation factor 4H    | 1.18800 | 0.47200 | 0.34283 | 0.00099 | COB; MP; reproduction         |

|            |                                                                        |         |         |         |         |                      |
|------------|------------------------------------------------------------------------|---------|---------|---------|---------|----------------------|
| A4QPC5     | Chymase                                                                | 0.97100 | 0.53400 | 0.78849 | 0.00945 | COB; CH; MP; RBP; RS |
| P62858     | 40S ribosomal protein S28                                              | 0.90700 | 0.56400 | 0.43526 | 0.00196 | COB; MP              |
| Q8R1G2     | Carboxymethylenebutenolidase homolog                                   | 1.26300 | 0.53200 | 0.09752 | 0.00021 | MP                   |
| P56380     | Bis(5'-nucleosyl)-tetraphosphatase<br>[asymmetrical]                   | 0.71600 | 0.36900 | 0.27119 | 0.00151 | CDe                  |
| E9PYG5     | Gamma-parvin                                                           | 0.89100 | 0.42900 | 0.79468 | 0.02109 | COB                  |
| Q924M7     | Mannose-6-phosphate isomerase                                          | 1.29700 | 0.59800 | 0.10200 | 0.00933 | MP                   |
| Q3THE2     | Myosin regulatory light chain 12B                                      | 0.97100 | 0.42500 | 0.73984 | 0.00005 | RBP                  |
| F6ULR7     | Myosin regulatory light chain 2, skeletal muscle<br>isoform (Fragment) | 0.98700 | 0.40500 | 0.90597 | 0.00000 |                      |
| Q64152     | Transcription factor BTF3                                              | 0.86000 | 0.52200 | 0.50585 | 0.01057 | MP; RBP; T           |
| Q9CQ91     | NADH dehydrogenase [ubiquinone] 1 alpha<br>subcomplex subunit 3        | 0.94600 | 0.48000 | 0.63276 | 0.00241 | COB; MP; T           |
| A0A0R4IZY0 | Thimet oligopeptidase                                                  | 1.08500 | 0.53300 | 0.60500 | 0.00029 | MP; RBP; RS          |
| Q9CY64     | Biliverdin reductase A                                                 | 1.03200 | 0.59600 | 0.94822 | 0.02265 | MP                   |
| Q9DC77     | Small muscular protein                                                 | 0.72800 | 0.52600 | 0.29724 | 0.01536 |                      |
| Q9DAK9     | 14 kDa phosphohistidine phosphatase                                    | 1.15400 | 0.52800 | 0.37008 | 0.00020 | MP; RBP              |
| E0CYV0     | Protein-L-isoaspartate O-methyltransferase                             | 1.28800 | 0.42800 | 0.09465 | 0.00003 | MP; RBP              |
| P45591     | Cofilin-2                                                              | 1.09800 | 0.47200 | 0.43107 | 0.00002 | COB; CH; RBP         |
| D3YZD8     | Mth938 domain-containing protein                                       | 1.17000 | 0.40400 | 0.29393 | 0.00001 | RBP                  |
| A0A1B0GSX6 | PDZ and LIM domain 3, isoform CRA_a                                    | 1.19600 | 0.57400 | 0.18729 | 0.00109 | COB                  |
| P70349     | Histidine triad nucleotide-binding protein 1                           | 1.16200 | 0.54600 | 0.23106 | 0.00029 | CDe; MP; RBP; RS     |
| P62897     | Cytochrome c, somatic                                                  | 1.17300 | 0.56600 | 0.17924 | 0.00114 | CDe; MP; RBP; T      |
| Q8R2G4     | Ecto-ADP-ribosyltransferase 3                                          | 1.18600 | 0.38600 | 0.33038 | 0.00010 | MP                   |

|            |                                                 |         |         |         |         |                                        |
|------------|-------------------------------------------------|---------|---------|---------|---------|----------------------------------------|
| O89017     | Legumain                                        | 0.98100 | 0.48200 | 0.91839 | 0.00016 | MP; RBP; RS                            |
| P13516     | Acyl-CoA desaturase 1                           | 0.83900 | 0.56200 | 0.41325 | 0.02600 | CDif; DR; MP; RBP; RS                  |
| Q8R2H9     | Phosphoethanolamine/phosphocholine phosphatase  | 0.93200 | 0.53900 | 0.74897 | 0.02459 | MP; RBP                                |
| D3YVS1     | Smoothelin                                      | 1.23300 | 0.50900 | 0.07670 | 0.00012 |                                        |
| Q3TMH2     | Secernin-3                                      | 1.10800 | 0.44100 | 0.61934 | 0.00095 | MP; T                                  |
| P06745     | Glucose-6-phosphate isomerase                   | 1.22100 | 0.56600 | 0.09247 | 0.00112 | MP; RBP; RS                            |
| P24472     | Glutathione S-transferase A4                    | 0.63800 | 0.37800 | 0.17928 | 0.00952 | MP; RS                                 |
| Q9D1X0     | Nucleolar protein 3                             | 0.99700 | 0.40900 | 0.91572 | 0.00056 | CDe; CDif; COB; CP; CH; MP; RBP; RS; T |
| P09541     | Myosin light chain 4                            | 0.85500 | 0.55000 | 0.32679 | 0.02134 | RBP                                    |
| Q9DBB8     | Trans-1,2-dihydrobenzene-1,2-diol dehydrogenase | 1.30600 | 0.58000 | 0.21642 | 0.02789 | MP                                     |
| P54823     | Probable ATP-dependent RNA helicase DDX6        | 1.34300 | 0.58500 | 0.17844 | 0.03634 | COB; MP; RBP                           |
| Q9JLV1     | BAG family molecular chaperone regulator 3      | 1.25100 | 0.54500 | 0.12248 | 0.00056 | CDe; RBP; RS                           |
| Q8CI12     | Smoothelin-like protein 2                       | 1.05100 | 0.47100 | 0.84543 | 0.00480 |                                        |
| E9Q0F0     | Keratin 78                                      | 1.04800 | 0.47500 | 0.89452 | 0.00019 | COB; CCM; MP; RBP; T                   |
| Q8QZR5     | Alanine aminotransferase 1                      | 1.30800 | 0.42900 | 0.14760 | 0.00141 | MP                                     |
| Q9CQX8     | 28S ribosomal protein S36, mitochondrial        | 1.25000 | 0.58900 | 0.15550 | 0.00999 |                                        |
| P03911     | NADH-ubiquinone oxidoreductase chain 4          | 1.09500 | 0.53200 | 0.61784 | 0.00038 | MP; RS; T                              |
| Q8R404     | MICOS complex subunit MIC13                     | 1.19600 | 0.45200 | 0.42379 | 0.01765 | COB                                    |
| Q64310     | Surfeit locus protein 4                         | 0.93800 | 0.52300 | 0.76927 | 0.01852 | COB; RBP                               |
| A0A0R4J032 | Complement component 9                          | 1.05500 | 0.58000 | 0.86481 | 0.00325 | COB; C; DR; MP; RBP; RS                |
| Q5SWU9     | Acetyl-CoA carboxylase 1                        | 0.98800 | 0.59100 | 0.82123 | 0.00310 | COB; MP; RS                            |



|            |                                                                   |         |         |         |         |                                  |
|------------|-------------------------------------------------------------------|---------|---------|---------|---------|----------------------------------|
| Q9QYG0     | Protein NDRG2                                                     | 1.17200 | 0.56300 | 0.18060 | 0.00101 | CDif; D; RBP; RS                 |
| P62843     | 40S ribosomal protein S15                                         | 0.96800 | 0.50800 | 0.73890 | 0.00299 | CDif; COB; MP; T                 |
| Q9WTL7     | Acyl-protein thioesterase 2                                       | 1.00000 | 0.26100 | 0.99750 | 0.00000 | MP                               |
| P97355     | Spermine synthase                                                 | 0.85300 | 0.50000 | 0.29675 | 0.00337 | MP                               |
| Q62426     | Cystatin-B                                                        | 0.59200 | 0.63400 | 0.00038 | 0.04774 | RBP; RS                          |
| E9Q8T1     | Transforming acidic coiled-coil-containing protein 2              | 0.01000 | 1.10000 | 0.00000 | 0.90907 | CDif; COB; CP; CCM; RBP; T       |
| A0A140T8T7 | Collagen alpha-5(VI) chain                                        | 0.20800 | 0.64900 | 0.00000 | 0.24036 |                                  |
| P32037     | Solute carrier family 2, facilitated glucose transporter member 3 | 0.01000 | 1.10800 | 0.00000 | 0.96232 | T                                |
| Q08943     | FACT complex subunit SSRP1                                        | 0.45000 | 1.27900 | 0.00327 | 0.45491 | MP; RBP; RS                      |
| Q9Z0M5     | Lysosomal acid lipase/cholesteryl ester hydrolase                 | 0.01000 | 0.61700 | 0.00000 | 0.09232 | COB; CP; DR; MP; RS              |
| Q8VCG4     | Complement component C8 gamma chain                               | 0.01000 | 0.64500 | 0.00000 | 0.13176 | DR; MP; RBP; RS                  |
| Q9D7S7     | 60S ribosomal protein L22-like 1                                  | 0.49800 | 1.22800 | 0.00961 | 0.63144 | MP                               |
| Q3V3R1     | Monofunctional C1-tetrahydrofolate synthase, mitochondrial        | 0.42300 | 1.17200 | 0.00001 | 0.59182 | MP                               |
| Q99L45     | Eukaryotic translation initiation factor 2 subunit 2              | 0.47800 | 0.93400 | 0.00288 | 0.60075 | CP; MP                           |
| O55103     | Periaxin                                                          | 0.56700 | 1.36800 | 0.00000 | 0.10601 | COB; RBP                         |
| A0A1L1SRX2 | AMP deaminase                                                     | 0.53300 | 1.00400 | 0.00359 | 0.81067 | MP                               |
| Q9R0P9     | Ubiquitin carboxyl-terminal hydrolase isozyme L1                  | 0.57200 | 0.92700 | 0.00015 | 0.60181 | CC; COB; CP; CCM; MP; RBP; RS; T |
| V9GWW6     | Muscular LMNA-interacting protein                                 | 0.48100 | 0.60400 | 0.00004 | 0.05216 |                                  |
| Q61462     | Cytochrome b-245 light chain                                      | 0.58200 | 0.70500 | 0.00085 | 0.15911 | COB; CH; DR; MP; RBP; RS; T      |
| Q8BWF0     | Succinate-semialdehyde dehydrogenase,                             | 0.54400 | 1.46000 | 0.03158 | 0.40343 | COB; MP                          |

## mitochondrial

|        |                                              |         |         |         |         |                         |
|--------|----------------------------------------------|---------|---------|---------|---------|-------------------------|
| P48024 | Eukaryotic translation initiation factor 1   | 0.41000 | 0.67000 | 0.00000 | 0.11767 | MP; RBP                 |
| P08551 | Neurofilament light polypeptide              | 0.57000 | 1.02600 | 0.00001 | 0.97056 | COB; CCM; RBP; RS; T    |
| P16330 | 2',3'-cyclic-nucleotide 3'-phosphodiesterase | 0.51900 | 1.11600 | 0.00058 | 0.77658 | CDif; COB; MP; RS       |
| O88531 | Palmitoyl-protein thioesterase 1             | 0.56000 | 1.33700 | 0.00254 | 0.32598 | COB; CH; MP; RBP; RS; T |

---

**Supplementary Table 3. Functional classification of proteins differentially expressed in ischemic non-treated mice (SC) vs sham mice (SH) on day 2 after femoral artery ligation surgery.** Proteins classification was made by the IPA software based on biomedical literature and integrated databases. The table shows the most probably pathways or functions in which the proteins of interest are involved; the main categories, the related functions or diseases, p-value, molecules (protein names) and number of proteins per category.

| Categories                                                   | Function                      | P-value  | Molecules                                                                                                                                                                                                                                                                                                                                                                                 | Proteins |
|--------------------------------------------------------------|-------------------------------|----------|-------------------------------------------------------------------------------------------------------------------------------------------------------------------------------------------------------------------------------------------------------------------------------------------------------------------------------------------------------------------------------------------|----------|
| Cardiovascular disease                                       | Vascular lesion               | 3.74E-08 | ALOX5AP, APOA1, APOA4, APOB, APOE, CD44, CRP, CTSC, FGG, FLNA, FN1, HSPG2, LCAT, LOX, PARP1, PLG, PLIN2, PON1, PTPRC, SERPIND1                                                                                                                                                                                                                                                            | 19       |
|                                                              | Occlusion of artery           | 1.09E-16 | ACE, ALDH5A1, ALOX5AP, APCS, APOA1, APOA4, APOB, APOE, C5 CA1, CA3, CD44, CLU, CRP, F10, F2, FGG, FN1, GCLM, HBA1/HBA2, Hrg, HSPG2, ITGAM, LCAT, LGALS3, LOX, LRRC20, MB, MTHFD1L, NCEH1, PARP1, PF4, PLG, PLIN2, PON1, RHOG, S100A9, SAA1, SERPINA1, SERPINA3, SERPINC1, SERPIND1, TKT, TTN                                                                                              | 44       |
|                                                              | Atherosclerosis               | 2.85E-13 | ACE, ALDH5A1, ALOX5AP, APCS, APOA1, APOA4, APOB, APOE, C5 CA1, CA3, CD44, CLU, CRP, F2, FGG, FN1, GCLM, HBA1/HBA2, HP, HSPG2, ITGAM, LCAT, LGALS3, LRRC20, MTHFD1L, NCEH1, PARP1, PF4, PLG, PLIN2, PON1, S100A9, SAA1, SERPINC1, SERPIND1, TKT                                                                                                                                            | 36       |
| Cardiovascular System,<br>Cellular and Tissue<br>Development | Angiogenesis                  | 2.26E-09 | ALDH1A2, ANXA1, ANXA3, APOA1, APOB, APOE, APOH, C3, C5, CAMP, CD44, CHI3L1, CYCS, DAB2, F2, FLNA, FN1, FSTL1, G6PD, GCLM, HMGB2, Hrg, HSPG2, Ighg2b, IQGAP1, ITGAM, KNG1, LGALS3, LOX, LRG1, MB, MYH9, Ngp, PARP1, PDE2A, PF4, PGK1, PLG, RDX, PHOG, SAA1, SERPINB5, SERPINC1, SERPIND1, SERPINF2, SYK, TKT, TPT1, VTN                                                                    | 49       |
|                                                              | Vasculogenesis                | 7.15E-10 | ALDH1A2, ANXA1, APOA1, APOB, APOE, APOH, C3, C5, CAMP, CD44, CHI3L1, CYCS, DAB2, F2, FLNA, FN1, FSTL1, G6PD, GCLM, HMGB2, HSPG2, Ighg2b, IQGAP1, ITGAM, KNG1, LGALS3, LOX, LRG1, MB, MYH9, PARP1, PDE2A, PF4, PLG, RDX, PHOG, SAA1, SERPINB5, SERPINC1, SERPIND1, SERPINF2, SYK, TKT, VTN                                                                                                 | 44       |
|                                                              | Development of vasculature    | 1.92E-12 | ACE, ALDH1A2, ANXA1, ANXA3, APOA1, APOB, APOE, APOH, C3, C5, CAMP, CD44, CFH, CHI3L1, CLU, CYCS, DAB2, F2, FGA, FLNA, FN1, FSTL1, G6PD, GCLM, HMGB2, Hrg, HSPB7, HSPG2, Ighg2b, IGHM, IQGAP1, ITGAM, KNG1, LGALS3, LOX, LRG1, MB, MPI, Mug1/Mug2, MYH9, Ngp, NOL3, PARP1, PDE2A, PF4, PGK1, PLG, Pzp, RDX, PHOG, SAA1, SERPINB5, SERPINC1, SERPIND1, SERPINF2, SYK, TKT, TPT1, UCHL3, VTN | 60       |
|                                                              | Endothelial cell delvelopment | 4.38E-08 | ALDH1A2, APOA1, APOE, APOH, C3, CAMP, CD44, DAB2, F2, FN1, G6PD, HMGB2, HSPG2, Ighg2b, IQGAP1, KNG1, LGALS3, LRG1, PDE2A, PF4, PLG, SAA1, SERPINC1, VTN                                                                                                                                                                                                                                   | 24       |

|                         |                    |          |                                                                                                                                                                                                                                                                                                                                                                                                                                                                                                                                                                                                                                                                                                                  |     |
|-------------------------|--------------------|----------|------------------------------------------------------------------------------------------------------------------------------------------------------------------------------------------------------------------------------------------------------------------------------------------------------------------------------------------------------------------------------------------------------------------------------------------------------------------------------------------------------------------------------------------------------------------------------------------------------------------------------------------------------------------------------------------------------------------|-----|
| Cell death and survival | Apoptosis          | 1.38E-11 | AAMDC, ACE, ALB, ALDH1A1, ANXA1, APIP, APOA1, APOE, B2M, BCL2L13, BIN1, C3, C5, CA3, CAMP, CAPN3, CD44, CFH, CHI3L1, CLU, CORO1A, CRP, CSNK2A1, CYCS, DAB2, DSP, F2, FCER1G, FGA, FHL1, FLNA, FN1, FSTL1, G6PD, GAPDH, GCLM, CLO1, GNG5, GPLD1, GSN, GSTM5, HBA1/HBA2, HMGB2, HSPB8, HSPG2, IGHM, ITGAM, ITIH4, KRT17, LGALS3, LGALS7/LGALS7B, LOX, LTF, MAP4, MB, MDH1, NCEH1, NOL3, NUDT2, OBSCN, PAK2, PARK7, PARP1, PDCD5, PF4, PLG, PRDX4, PTPRC, RANBP1, RDX, S100A6, S100A9, SAA1, SERPINA1, SERPINA3, SERPINB1, SERPINB5, SERPINC1, SFN, SH3BGRL3, SLC2A3, STK24, SYK, TMOD3, TNFAIP8, TPT1, TTN, TTR, UBE2M, VTN, WFS1, YBX3                                                                            | 92  |
|                         | Necrosis           | 4.80E-12 | ALB, ALDH1A1, ANXA1, APIP, APOA1, APOB, APOC3, APOE, B2M, C3, C5, CAMP, CD44, CFH, CHI3L1, CLU, CORO1A, CRP, CSNK2A1, CYCS, DAB2, DSP, F2, FABP3, FCER1G, FGA, FHL1, FLNA, FN1, FSTL1, G6PD, GAPDH, GCLM, GLO1, GSN, GSTM5, HLA-A, HMGB2, HRPT1, HSPB8, IGHM, ITGAM, ITIH4, KNG1, LAMP2, LBP, LGALS3, LGALS7/LGALS7B, LTF, LYZ, MAP4, MB, MDH1, Mug1/Mug2, NCEH1, NEFH, NEK7, NOL3, PAK2, PARK7, PARP1, PF4, PLG, PTPRC, Pzp, RDX, RPL35, S100A6, S100A9, SAA1, SERPINA1, SERPINA3, SERPINB5, SERPINC1, SFN, SYK, TMOD3, TNFAIP8, TNNT1, TPT1, TTN, TTR, UBE2L3, UBE2M, VTN, WFS1                                                                                                                                | 85  |
| Cellular movement       | Cell movement      | 1.44E-19 | ACTB, ACTR3, ALB, ALOX5AP, ANXA1, ANXA3, APCS, APOA1, APOB, APOE, ARHGAP4, ARPC2, ARPC3, BIN2, C3, C4A/C4B, C5, CAMP, CAP1, CD44, CFD, CFH, CHI3L1, Chil3/Chil4, CLU, CORO1A, CRP, CSNK2A1, CTSC, DAB2, DDT, DSP, DSTN, F10, F2, FCER1G, FGB, FHL1, FHL3, FLNA, FN1, FSTL1, G6PD, GAPSH, GC, GPLD1, GSN, Hbb-b1, Hbb-b2, HLA-1, HMGB2, HP, Hrg, HSPG2, Ighg2b, IGHM, IGKC, IQGAP1, ITGAM, KNG1, KRT6B, LBP, LCAT, LCP1, LGALS3, LOX, LTF, LYZ, MAP4, MAPK12, MYH9, NACA, NEXN, OBSCN, PAK2, PARP1, PDE2A, PDK4, PEBP1, PF4, PGLYRP1, PLG, PTPRC, RDX, RHOG, S100A9, SAA1, SERPINA1, SERPINA3, SERPINB1, SERPINB5, SERPINC1, SERPIND1, SERPING1, SLC9A3R1, STK24, SYK, TKT, TMOD3, TNFAIP8, TPI1, TPT1, TUBB, VTN | 103 |
|                         | Migration of cells | 2.53E-16 | ACTB, ACTR3, ALB, ALOX5AP, ANXA1, ANXA3, APCS, APOA1, APOB, APOE, ARHGAP4, ARPC2, C3, C4A/C4B, C5, CAMP, CAP1, CD44, CFD, CFH, CHI3L1, Chil3/Chil4, CLU, CORO1A, CRP, CSNK2A1, CTSC, DAB2, DDT, DSP, F10, F2, FCER1G, FGB, FHL1, FLNA, FN1, FSTL1, G6PD, GC, GPLD1, Hbb-b1, Hbb-b2, HLA-A, HP, Hrg, Ighg2b, IGHM, IGKC, IQGAP1, ITGAM, KNG1, KRT6B, LBP, LCAT, LCP1, LGALS3, LOX, LYZ, MAP4, MAPK12, MYH9, NACA, NEXN, PAK2, PARP1, PDE2A, PDK4, PF4, PGLYRP1, PLG, PTPRC, RDX, RHOG, S100A9, SAA1, SERPINA1, SERPINA3, SERPINB1, SERPINB5, SERPINC1, SERPIND1, SERPING1, SLC9A3R1, STK24, SYK, TMOD3, TNFAIP8, TPT1, VTN                                                                                        | 90  |

**Supplementary Table 4. Functional classification of differently expressed proteins in ischemic non-treated mice (SC) vs sham mice (SH) on day 4 after femoral artery ligation surgery.**

Proteins classification was made by the IPA software based on biomedical literature and integrated databases. The table shows the most probably pathways or functions in which the proteins of interest are involved; the main categories, the related functions or diseases, p-value, molecules (protein names) and number of proteins per category.

| Categories                                             | Function                     | P-value  | Molecules                                                                                                                                                                                                                                                                                                                                   | Proteins |
|--------------------------------------------------------|------------------------------|----------|---------------------------------------------------------------------------------------------------------------------------------------------------------------------------------------------------------------------------------------------------------------------------------------------------------------------------------------------|----------|
| Cardiovascular Disease                                 | Vascular lesion              | 6,85E-13 | ALOX5AP, APOA1, APOA4, APOB, APOE, CD44, CRP, CTSC, FGG, FLNA, FN1, HMOX1, HSPG2, LCAT, LOX, NCF1, PARP1, PFN1, PLG, SERPIND1, VCAN                                                                                                                                                                                                         | 21       |
|                                                        | Occlusion of artery          | 3,86E-19 | ALOX5AP, APCS, APOA1, APOA4, APOB, APOE, C5, CA3, CD14, CD44, CLU, CRP, F10, F13A1, F2, FGG, FN1, GCLM, HMOX1, Hrg, HSPG2, LCAT, LGALS3, LOX, MB, NCF1, PARP1, PF4, PFN1, PLG, PLIN2, RHOG, S100A9, SERPINA1, SERPINA3, SERPIND1, TTN, UCP1, VCAN                                                                                           | 39       |
|                                                        | Atherosclerosis              | 1,66E-14 | ALOX5AP, APCS, APOA1, APOA4, APOB, APOE, C5, CA3, CD14, CD44, CLU, CRP, F13A1, F2, FGG, FN1, GCLM, HMOX1, HSPG2, LCAT, LGALS3, NCF1, PARP1, PF4, PFN1, PLG, PLIN2, S100A9, SERPIND1, UCP1, VCAN                                                                                                                                             | 31       |
|                                                        | Peripheral vascular disease  | 5,95E-10 | APOA1, APOB, APOE, APOH, B2M, CA3, CFH, COL4A1, CRP, CTSB, CTSC, DAB2, F10, F13A1, F2, FABP3, LCP1, PDLIM5, PLG, S100A9, SERPINA1, SERPINA3, SERPIND1, SLC2A3, VIM                                                                                                                                                                          | 25       |
| Cardiovascular System, Cellular and Tissue Development | Angiogenesis                 | 1,16E-14 | ALDH1A2, ANXA1, APOA1, APOB, APOE, APOH, ARG1, C3, C5, CAMP, CD44, CHI3L1, COL4A1, CTSB, CYCS, DAB2, F2, FBLN2, FGR, FLNA, FN1, FSTL1, G6PD, GCLM, HMOX1, Hrg, HSPG2, Ighg2b, IQGAP1, KNG1, LGALS3, LOX, LRG1, MB, MYH9, NCF1, Ngp, PARP1, PDE2A, PF4, PLG, RHOG, SERPINB5, SERPIND1, SGPL1, VIM, VTN                                       | 47       |
|                                                        | Vasculogenesis               | 1,40E-14 | ALDH1A2, ANXA1, APOA1, APOB, APOE, APOH, ARG1, C3, C5, CAMP, CD44, CHI3L1, COL4A1, CTSB, CYCS, DAB2, F2, FLNA, FN1, FSTL1, G6PD, GCLM, HMOX1, HSPG2, Ighg2b, IQGAP1, KNG1, LGALS3, LOX, LRG1, MB, MYH9, PARP1, PDE2A, PF4, PLG, RHOG, SERPINB5, SERPIND1, SGPL1, VIM, VTN                                                                   | 42       |
|                                                        | Development of vasculature   | 3,55E-16 | ALDH1A2, ANXA1, APOA1, APOB, APOE, APOH, ARG1, C3, C5, CAMP, CD44, CFH, CHI3L1, CLU, COL4A1, CTSB, CYCS, DAB2, F2, FBLN2, FGA, FGR, FLNA, FN1, FSTL1, G6PD, GCLM, HMOX1, Hrg, HSPG2, Ighg2b, IQGAP1, KNG1, LGALS3, LOX, LRG1, MB, Mug1/Mug2, MYH9, NCF1, Ngp, PARP1, PDE2A, PF4, PLG, PLOD1, Pzp, RHOG, SERPINB5, SERPIND1, SGPL1, VIM, VTN | 53       |
|                                                        | Endothelial cell development | 1,46E-11 | ALDH1A2, APOA1, APOE, APOH, ARG1, C3, CAMP, CD44, COL4A1, DAB2, F2, FN1, G6PD, HMOX1, HSPG2, Ighg2b, IQGAP1, KNG1, LGALS3, LRG1, PDE2A, PF4, PLG, VTN                                                                                                                                                                                       | 24       |
| Cell Morphology, Tissue Development                    | Tubulation of cells          | 5,80E-06 | ANXA1, CD44, CHI3L1, CSRP3, FLNA, G6PD, PARP1, PLG, SERPIND1, VIM                                                                                                                                                                                                                                                                           | 10       |

|                         |                    |          |                                                                                                                                                                                                                                                                                                                                                                                                                                                                                                                                                                                                             |    |
|-------------------------|--------------------|----------|-------------------------------------------------------------------------------------------------------------------------------------------------------------------------------------------------------------------------------------------------------------------------------------------------------------------------------------------------------------------------------------------------------------------------------------------------------------------------------------------------------------------------------------------------------------------------------------------------------------|----|
| Cell Death and Survival | Apoptosis          | 2,07E-10 | ALDH1A2, ANXA1, APOA1, APOE, ARG1, B2M, C3, C5, CA3, CAMP, CD14, CD44, CFH, CHI3L1, CLU, COL4A1, CRP, CTSB, CTSZ, CYCS, DAB2, DSP, F2, FCER1G, FGA, FHL1, FLNA, FN1, FSTL1, G6PD, GCLM, GSN, HIST1H1C, HMOX1, HSPG2, KRT17, LGALS3, LGMN, LOX, LTF, MAP4, MB, MDH1, MSRB3, NCF1, PARK7, PARP1, PF4, PFN1, PLG, PRDX4, S100A4, S100A6, S100A9, SERPINA1, SERPINA3, SERPINB1, SERPINB5, SGPL1, SH3BGRL3, SLC2A3, STMN1, TNFAIP8, TTN, TTR, UCP1, VTN                                                                                                                                                          | 67 |
|                         | Necrosis           | 1,99E-16 | ALDH1A2, ANXA1, APOA1, APOB, Apoc3, APOE, B2M, C3, C5, CAMP, CD14, CD44, CFH, CHI3L1, CLU, COL4A1, CPB2, CRP, CTSB, CTSZ, CYCS, DAB2, DSP, EEF1A1, F13A1, F2, FABP3, FCER1G, FGA, FHL1, FLNA, FN1, FSTL1, G6PD, GCLM, GSN, HIST1H1C, HLA-A, HMOX1, HPRT1, LAMP2, LBP, LGALS3, LGMN, LTF, LYZ, MAP4, MB, MDH1, Mug1/Mug2, MYH6, NCF1, PABPC1, PARK7, PARP1, PF4, PFN1, PLG, Pzp, RPL3, S100A6, S100A9, SERPINA1, SERPINA3, SERPINB5, SGPL1, STMN1, TNFAIP8, TNNT1, TTN, TTR, UCP1, VTN                                                                                                                       | 73 |
| Cellular Movement       | Cell movement      | 2,79E-26 | ACTB, ALOX5AP, ANXA1, APBB1IP, APCS, APOA1, APOB, APOE, ARG1, ARHGAP4, ARPC2, ARPC3, C3, C4A/C4B, C5, CAMP, CAP1, CD14, CD44, CFD, CFH, CHI3L1, Chil3/Chil4, CLU, COL4A1, CPB2, CRP, CTSB, CTSC, CTSZ, DAB2, DSP, F10, F13A1, F2, FBLN2, FCER1G, FGB, FGR, FHL1, FHL3, FLNA, FN1, FSCN1, FSTL1, G6PD, GC, GSN, HLA-A, HMOX1, HP, Hrg, HSPG2, Ighg2b, IGKC, IQGAP1, KNG1, LBP, LCAT, LCP1, LGALS3, LGMN, LOX, LYZ, MAP4, MYH6, MYH9, NCF1, PARP1, PDE2A, PF4, PFN1, PLG, RCC2, RHOG, S100A4, S100A9, SERPINA1, SERPINA3, SERPINB1, SERPINB5, SERPIND1, SERPING1, SGPL1, STMN1, TNFAIP8, TUBB, VCAN, VIM, VTN | 90 |
|                         | Migration of cells | 1,39E-25 | ACTB, ALOX5AP, ANXA1, APBB1IP, APCS, APOA1, APOB, APOE, ARHGAP4, ARPC2, C3, C4A/C4B, C5, CAMP, CAP1, CD14, CD44, CFD, CFH, CHI3L1, Chil3/Chil4, CLU, COL4A1, CPB2, CRP, CTSB, CTSC, CTSZ, DAB2, DSP, F10, F13A1, F2, FBLN2, FCER1G, FGB, FGR, FHL1, FLNA, FN1, FSCN1, FSTL1, G6PD, GC, GSN, HLA-A, HMOX1, HP, Hrg, Ighg2b, IGKC, IQGAP1, KNG1, LBP, LCAT, LCP1, LGALS3, LGMN, LOX, LYZ, MAP4, MYH6, MYH9, NCF1, PARP1, PDE2A, PF4, PFN1, PLG, RCC2, S100A4, S100A9, SERPINA1, SERPINA3, SERPINB1, SERPINB5, SERPIND1, SERPING1, SGPL1, STMN1, TNFAIP8, VCAN, VIM, VTN                                       | 84 |

**Supplementary Table 5. Primary antibodies used in this study.**

| <b>Antibody</b>               | <b>Reactivity</b> | <b>Dilution</b> | <b>Supplier</b> | <b>Reference</b> | <b>Used in</b> |
|-------------------------------|-------------------|-----------------|-----------------|------------------|----------------|
| CD31-FITC                     | Human             | 1:25            | Biologend       | 303103           | FC             |
| CD34-APC                      | Human             | 1:25            | Biologend       | 343607           | FC             |
| CD45-PBlue                    | Human             | 1:25            | Biologend       | 368539           | FC             |
| CD90-PE                       | Human             | 1:25            | Biologend       | 328109           | FC             |
| CD73-FITC                     | Human             | 1:25            | Biologend       | 344015           | FC             |
| CD105-FITC                    | Human             | 1:25            | Biologend       | 323203           | FC             |
| CD309-PE                      | Human             | 1:25            | Biologend       | 359903           | FC             |
| CD133-PE                      | Human             | 1:25            | Miltenyi Biotec | 130-098-826      | FC             |
| CD146-PE                      | Human             | 1:25            | Biologend       | 361005           | FC             |
| CD14-FITC                     | Human             | 1:25            | Biologend       | 367115           | FC             |
| $\alpha$ -Actin smooth muscle | Mouse             | 1:500           | ThermoFisher    | MA5-14084        | IHC            |
| CD31                          | Human             | 1:500           | Abcam           | AB32457          | IHC            |
| Ly-6G                         | Mouse             | 1:500           | Biologend       | 127601           | IHC            |
| Apo-E                         | Mouse             | 1:1000          | ThermoFisher    | PA5-78803        | WB             |

**Supplementary table 6. Secondary antibodies used in this study.**

| <b>Antibody</b>                 | <b>Reactivity</b> | <b>Dilution</b> | <b>Supplier</b> | <b>Reference</b> | <b>Used in</b> |
|---------------------------------|-------------------|-----------------|-----------------|------------------|----------------|
| Alexa Fluor 488 anti-rabbit IgG | Rabbit            | 1:500           | ThermoFisher    | R37116           | IHC            |
| Alexa Fluor 555 anti-rat IgG    | Rat               | 1:500           | ThermoFisher    | A21434           | IHC            |
| HRP anti-rabbit IgG             | Rabbit            | 1:5000          | Novus           | NB160            | WB             |

FC: Flow cytometry; IHC: Immunohistochemistry; WB: Western Blot

Additionally, for cell detection FITC-UEA-1 (1:300, Sigma L9006) and DiI-ac-LDL (Biomedical Technologies, BT-902, Stoughton, MA, USA) were used.

For IHC, the blocking reagent was 5% goat serum and 0.1% triton. Goat serum was obtained from Vector laboratories (ref. S-1000).
